# Supplementary material
Source: PubMed Central journal article supplement (PMC2884059)

# Catalytic Enantioselective Total Syntheses of Bakkenolides I, J and S: Application of a Carbene- Catalyzed Desymmetrization

Eric M. Phillips, John M. Roberts, and Karl A. Scheidt\*

*Department of Chemistry, Center for Molecular Innovation and Drug Discovery, Chemistry of  
Life Processes Institute, Northwestern University, Silverman Hall, Evanston, Illinois 60208*

## Supporting Information

|                                                                                                     |     |
|-----------------------------------------------------------------------------------------------------|-----|
| GENERAL INFORMATION .....                                                                           | S2  |
| EXPERIMENTAL PROCEDURES AND CHARACTERIZATION FOR THE SYNTHESIS OF BAKKENOLIDES<br>I, J, AND S ..... | S2  |
| SELECTED NMR SPECTRA .....                                                                          | S11 |
| GC TRACES .....                                                                                     | S27 |
| COMPARATIVE ANALYSIS USING <sup>1</sup> H NMR SPECTRA .....                                         | S28 |
| X-RAY CRYSTALLOGRAPHY OF <b>14</b> .....                                                            | S30 |
| X-RAY CRYSTALLOGRAPHY OF <b>A</b> .....                                                             | S31 |

## General Information

All reactions were carried out under a nitrogen atmosphere in flame-dried glassware with magnetic stirring.  $\text{CH}_3\text{CN}$  was purified by passage through a bed of activated alumina.<sup>1</sup> Reagents were purified prior to use unless otherwise stated following the guidelines of Perrin and Armarego.<sup>2</sup> Purification of reaction products was carried out by flash chromatography using EM Reagent silica gel 60 (230-400 mesh). Analytical thin layer chromatography was performed on EM Reagent 0.25 mm silica gel 60-F plates. Visualization was accomplished with UV light and ceric ammonium nitrate stain or potassium permanganate stain followed by heating. Infrared spectra were recorded on a Perkin Elmer 1600 series FT-IR spectrometer.  $^1\text{H-NMR}$  spectra were recorded on a Varian Inova 500 (500 MHz) spectrometer and are reported in ppm using solvent as an internal standard ( $\text{CDCl}_3$  at 7.26 ppm). Data are reported as (ap = apparent, s = singlet, d = doublet, t = triplet, q = quartet, m = multiplet, b = broad; coupling constant(s) in Hz; integration. Proton-decoupled  $^{13}\text{C-NMR}$  spectra were recorded on a Varian Inova 500 (125 MHz) spectrometer and are reported in ppm using solvent as an internal standard ( $\text{CDCl}_3$  at 77.0 ppm). Mass spectra data were obtained on a Varian 1200 Quadrupole Mass Spectrometer and Micromass Quadro II Spectrometer.

## Experimental Procedures and Characterization for the Synthesis of Bakkenolides I, J, and S

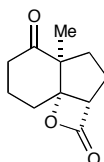

**(2a*S*,4a*S*,8<sup>1</sup>*S*)-4a-methylhexahydro-2*H*-indeno[1-*b*]oxete-2,5(6*H*)-dione (3)**: To a flame dried flask equipped with magnetic stirring bar was added aldehyde **2** (5.00 g, 25.7 mmol). The flask was sealed with a rubber septum and carried into a dry box under inert atmosphere. In the dry box, azolium salt **A** (622 mg, 1.3 mmol) was added. The material was diluted with degassed  $\text{CH}_2\text{Cl}_2$  (128 mL, 0.2 M) and degassed  $i\text{-Pr}_2\text{EtN}$  (4.48 mL, 25.7 mmol). The flask was sealed with a rubber septum and removed from the dry box. The flask was then equipped with an  $\text{N}_2$  inlet and heated to 30 °C for 48 hours. Upon consumption of starting material, the reaction was diluted with 200 mL of  $\text{CH}_2\text{Cl}_2$  and was washed with 50 mL aqueous sat.  $\text{NH}_4\text{Cl}$ . The layers were separated and the organic layer was washed with 50 mL aqueous sat.  $\text{NaCl}$ . The layers were separated and the organic layer was dried over  $\text{Na}_2\text{SO}_4$ . The solution was filtered and concentrated. The material was purified by flash column chromatography with 20% EtOAc in hexanes to 30% EtOAc in hexanes as an eluent to yield **3** (3.44 g, 69%) as a white solid. Analytical data for **3**: IR (film) 3026, 2957, 2931, 1684, 1496, 1455, 1181  $\text{cm}^{-1}$ ;  $^1\text{H NMR}$  (500 MHz,  $\text{CDCl}_3$ )  $\delta$  3.47 (dd,  $J = 7.6, 1.4$  Hz, 1H), 2.74 (ddd,  $J = 1.9, 6.4, 6.4$  Hz, 1H), 2.54 (ddd,  $J$

1. Pangborn, A. B.; Giardello, M. A.; Grubbs, R. H.; Rosen, R. K.; Timmers, F. J. *Organometal.* **1996**, *15*, 1518-1520.
2. Perrin, D. D. and Armarego, W. L. *Purification of Laboratory Chemicals*; 3rd Ed., Pergamon Press, Oxford. 1988.

= 5.9, 14.8, 14.8 Hz, 1H), 2.39-2.33 (m, 2H), 2.25 (dddd,  $J = 13.7, 3.1, 3.1, 1.4$  Hz, 1H), 2.12-2.07 (m, 1H), 1.94 (dd,  $J = 12.8, 5.5$  Hz, 1H), 1.63-1.49 (m, 2H), 1.41 (dddd,  $J = 28.5, 14.1, 3.7, 3.7$  Hz, 1H), 1.28 (s, 3H);  $^{13}\text{C}$  NMR (125 MHz,  $\text{CDCl}_3$ )  $\delta$  210.4, 170.4, 89.4, 59.0, 58.7, 37.1, 31.8, 28.0, 24.5, 19.4, 18.3; LRMS (ES): Mass calcd for  $\text{C}_{11}\text{H}_{14}\text{O}_3$   $[\text{M}]^+$ , 194. Found  $[\text{M}]^+$ , 194;  $[\alpha]_D$ : +36.2 ( $\text{CHCl}_3$ ,  $c = 0.4$ ,  $er = 99:1$ ). Enantiomeric ratio determined by GC (Beta Dex 225, 23.00 psi, 80 °C (hold for 20 min then increase temperature 5 °C/min) – 170°C,  $\text{Rt}_{\text{major}} = 26.95$ ,  $\text{Rt}_{\text{minor}} = 27.15$ ).

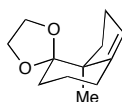

**(S)-3a'-methyl-2',3',3a',5',6',7'-hexahydrospiro[[1,3]dioxolane-2,4'-indene] (4):** To a tube equipped with a magnetic stirring bar was added **3** (2.25 g, 11.6 mmol) and 2.25 g  $\text{SiO}_2$ . The solution was diluted with benzene (5.3 mL, 2.2 M) the tube was sealed with a screw cap and rubber septum. The reaction vessel was heated to 70 °C for 48 hours. The material was filtered and the silica gel was washed with  $\text{Et}_2\text{O}$ . The solution was concentrated and used without further purification. To a flame dried flask equipped with magnetic stirring bar and  $\text{N}_2$  inlet was added TMSOTf (116  $\mu\text{L}$ , 0.12 mmol) and  $\text{CH}_2\text{Cl}_2$  (2 mL, 5.8 M). The flask was cooled to –78 °C in a dry ice/acetone bath.  $(\text{TMSOCH}_2)_2$  (2.39 g, 11.6 mmol) was added dropwise through a cannula. After 5 min., the ketone was transferred through a cannula to the reaction vessel in a dropwise fashion. Following the completion of the addition, to the flask previously containing the ketone was added 1 mL  $\text{CH}_2\text{Cl}_2$ . This solution was then transferred to the reaction through a cannula. After 3 hours of stirring at –78 °C, the reaction was warmed to –30 °C. After 12 hours the reaction was cooled to –78 °C and pyridine (234  $\mu\text{L}$ , 2.9 mmol) was added. The reaction was poured into a separatory funnel containing aqueous sat.  $\text{NaHCO}_3$  (5 mL). The material was extracted and the layers were separated. The aqueous layer was then extracted with diethyl ether (2 x 20 mL). The combined organics were washed with aqueous sat.  $\text{NaCl}$ , aqueous 10%  $\text{CuSO}_4$ , and aqueous sat.  $\text{NaCl}$ . The organic layer was dried over  $\text{Na}_2\text{SO}_4$ , filtered and concentrated. The material was purified by flash column chromatography with 5% ether in pentane as an eluent to afford ketal **4** (2.21 g, 98%) as a clear oil. Analytical data for **4**: IR (film) 2940, 2885, 1467, 1452, 1179, 1123, 1090  $\text{cm}^{-1}$ ;  $^1\text{H}$  NMR (500 MHz,  $\text{CDCl}_3$ )  $\delta$  5.28 (m, 1H), 3.95 (s, 4H), 2.30-2.14 (m, 4H), 2.05-1.97 (m, 1H), 1.78-1.61 (m, 3H), 1.51-1.42 (m, 2H), 1.17 (s, 3H);  $^{13}\text{C}$  NMR (125 MHz,  $\text{CDCl}_3$ )  $\delta$  147.3, 121.6, 112.6, 65.1, 64.6, 54.7, 31.0, 30.2, 29.4, 24.6, 23.3, 21.9; LRMS (EI): Mass calcd for  $\text{C}_{12}\text{H}_{18}\text{O}_2$   $[\text{M}]^+$ , 194. Found  $[\text{M}]^+$ , 194;  $[\alpha]_D$ : +6.25 ( $\text{CHCl}_3$ ,  $c = 0.1$ ).

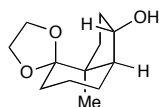

**(1'S,3a'S,7a'S)-3a'-methyloctahydrospiro[[1,3]dioxolane-2,4'-inden]-1'-ol (5):** To a flame-dried flask equipped with magnetic stirring bar and  $\text{N}_2$  inlet was added ketal **4** (2.25 g, 11.6 mmol). The material was diluted with THF (12 mL, 0.97 M) and the flask was cooled to 0 °C with an ice/water bath.  $\text{BH}_3 \cdot \text{SMe}_2$  (~10 M, 1.39 mL, 13.9 mmol) was added slowly through a syringe. The reaction stirred under  $\text{N}_2$  atmosphere for 3 hours. To the reaction was added 3 N  $\text{NaOH}$  (11.6 mL, 34.8 mmol) and then  $\text{H}_2\text{O}_2$  (30% solution in  $\text{H}_2\text{O}$ , 5.92 mL, 58 mmol). After 1 hour the reaction was diluted with diethyl ether (50 mL) and washed with aqueous sat.  $\text{NaCl}$  (10

mL). The layers were separated and the organic layer was dried over  $\text{Na}_2\text{SO}_4$ , filtered and concentrated. The material was purified by flash column chromatography with 30%  $\text{Et}_2\text{O}$  in pentane to 40%  $\text{Et}_2\text{O}$  in pentane as an eluent to afford alcohol **5** (1.85 g, 75%) as a colorless oil. Analytical data for **5**: IR (film) 3376, 2937, 2870, 1457, 1343, 1121  $\text{cm}^{-1}$ ;  $^1\text{H}$  NMR (500 MHz,  $\text{CDCl}_3$ )  $\delta$  4.28 (ddd,  $J = 8.3, 8.3, 5.4$  Hz, 1H), 3.95-3.88 (m, 4H), 2.18-2.11 (m, 1H), 1.84-1.79 (m, 1H), 1.66-1.36 (m, 9H), 1.17 (s, 3H);  $^{13}\text{C}$  NMR (125 MHz,  $\text{CDCl}_3$ )  $\delta$  112.8, 76.0, 75.3, 64.5, 56.0, 47.9, 33.4, 32.4, 30.6, 24.3, 22.3, 20.3; LRMS (ES): Mass calcd for  $\text{C}_{12}\text{H}_{20}\text{O}_3$   $[\text{M}+1]^+$ , 213. Found  $[\text{M}+1]^+$ , 213;  $[\alpha]_{\text{D}}$ : +2.69 ( $\text{CHCl}_3$ ,  $c = 0.39$ ).

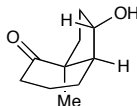

**(1S,3aS,7aS)-1-hydroxy-3a-methylhexahydro-1H-inden-4(2H)-one (18)**: To a round bottom flask equipped with a magnetic stirring bar was added ketal **5** (1.52 g, 7.2 mmol). Acetone (20 mL, 0.24 M) and  $\text{H}_2\text{O}$  (7.2 mL, 1 M). The reaction was cooled to 0  $^\circ\text{C}$  and *p*-TsOH (685 mg, 3.6 mmol) was added in one portion and the flask was covered with a rubber septum. The reaction was allowed to warm to 20  $^\circ\text{C}$  gradually. After 5 hours the reaction was diluted with brine and the solution was extracted with  $\text{CH}_2\text{Cl}_2$  (3 x 60 mL). The combined organics were washed with brine twice more. The solution was dried over  $\text{Na}_2\text{SO}_4$ , filtered and concentrated to afford pure **18** (1.20 g, 99%) as a colorless oil. Analytical data for **18**: IR (film) 3373, 2935, 2872, 1479, 1489  $\text{cm}^{-1}$ ;  $^1\text{H}$  NMR (500 MHz,  $\text{CDCl}_3$ )  $\delta$  3.92 (dd,  $J = 13.8, 7.5$  Hz, 1H), 2.50 (ddd,  $J = 15.1, 11.5, 6.3$  Hz, 1H), 2.40 (ddd, 12.9, 8.7, 5.8 Hz, 1H), 2.26 (dddd,  $J = 15.1, 4.5, 4.5, 1.4$  Hz, 1H), 1.98-1.75 (m, 6H), 1.54-1.40 (m, 2H), 1.29 (s, 3H);  $^{13}\text{C}$  NMR (125 MHz,  $\text{CDCl}_3$ )  $\delta$  215.8, 75.4, 57.4, 54.1, 38.6, 32.6, 31.8, 25.9, 23.2, 23.0; LRMS (EI): Mass calcd for  $\text{C}_{10}\text{H}_{16}\text{O}_2$   $[\text{M}]^+$ , 166. Found  $[\text{M}]^+$ , 166.  $[\alpha]_{\text{D}}$ : -27.71 ( $\text{CHCl}_3$ ,  $c = 1$ ).

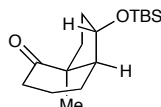

**(1S,3aS,7aS)-1-(tert-butyldimethylsilyloxy)-3a-methylhexahydro-1H-inden-4(2H)-one (6)**: To a flame dried flask equipped with magnetic stirring bar and rubber septum was added ketone **18** (1.20 g, 7.2 mmol) and  $\text{CH}_2\text{Cl}_2$  (24 mL, 0.3 M). The reaction vessel was cooled to 0  $^\circ\text{C}$  in an ice/water bath. Imidazole (1.5 g, 21.6 mmol) was added in one portion. After 5 minutes TBSCl (3.26 g, 21.6 mmol) was added in one portion. The flask was then removed from the ice bath and allowed to warm to 20  $^\circ\text{C}$ . After 6 hours the reaction was diluted with 30 mL  $\text{CH}_2\text{Cl}_2$  and washed with 10 mL  $\text{H}_2\text{O}$ . The layers were separated and the organic layer was washed with aqueous sat. NaCl (10 mL) and dried over  $\text{Na}_2\text{SO}_4$ , filtered and concentrated. The material was purified by flash column chromatography with 5% EtOAc in hexanes to 10% EtOAc in hexanes as an eluent to afford silyl ether **6** (2.00 g, 98%) as a colorless oil. Analytical data for **6**: IR (film) 2930, 2883, 2857, 1708, 1462, 1109  $\text{cm}^{-1}$ ;  $^1\text{H}$  NMR (500 MHz,  $\text{CDCl}_3$ )  $\delta$  3.78 (dd,  $J = 14.6, 7.8$  Hz, 1H), 2.50 (ddd,  $J = 14.9, 11.4, 6.2$  Hz, 1H), 2.37 (ddd,  $J = 12.9, 8.9, 6.5$  Hz, 1H), 2.25 (dddd,  $J = 14.8, 4.2, 4.2, 1.4$  Hz, 1H), 1.95-1.77 (m, 5H), 1.71-1.67 (m, 1H), 1.50-1.36 (m, 2H), 1.27 (s, 3H), 0.87 (s, 9H), 0.020 (s, 3H), 0.016 (s, 3H);  $^{13}\text{C}$  NMR (125 MHz,  $\text{CDCl}_3$ )  $\delta$  216.3, 75.2, 57.2, 53.3, 38.6, 32.4, 31.3, 26.0, 23.092, 23.086, 22.8, 18.3, -4.1, -4.5; LRMS (ES): Mass calcd for  $\text{C}_{16}\text{H}_{30}\text{O}_2\text{Si}$   $[\text{M}+1]^+$ , 283. Found  $[\text{M}+1]^+$ , 283;  $[\alpha]_{\text{D}}$ : -10.7 ( $\text{CHCl}_3$ ,  $c = 1.0$ ).

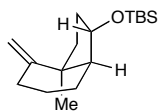

**tert-butyl((1*S*,3*aS*,7*aS*)-3*a*-methyl-4-methyleneoctahydro-1*H*-inden-1-yloxy)silane (7):** To a round bottom flask equipped with magnetic stirring bar, rubber septum, and N<sub>2</sub> inlet was added methyl-triphenylphosphonium bromide (azeotroped with benzene 3x, 9.9 g, 27.7 mmol) and toluene (68.3 mL, 0.1 M). To the flask was added dropwise freshly prepared KHMDS solution (30 mL, 0.82 M in toluene). After one hour of stirring at 20 °C, the reaction was cooled to 0 °C and a solution of ketone **6** (1.93 g, 6.83 mmol) in toluene (68.3 mL, 0.1 M) was added dropwise to the phosphonium ylide through a cannula. After the ketone was completely added the reaction was allowed to warm to 20 °C and stir for three hours. Upon consumption of starting material the reaction was quenched with H<sub>2</sub>O (30 mL) and extracted with Et<sub>2</sub>O (2 x 30 mL). The combined organic layers were washed with aqueous sat. NaCl (20 mL), dried over Na<sub>2</sub>SO<sub>4</sub>, filtered and concentrated. The solid was then diluted with hexanes and filtered. The solid material was washed with hexanes (5 x 20 mL). The combined filtrate was concentrated. The yellow oil was purified by flash column chromatography with 1% EtOAc in hexanes as an eluent affording alkene **7** (1.55 g, 81%) as a colorless oil. Analytical data for **7**: IR (film) 3080, 2929, 2893, 2856, 1741, 1636, 1383, 1254, 1097 cm<sup>-1</sup>; <sup>1</sup>H NMR (500 MHz, CDCl<sub>3</sub>) δ 4.69 (dd, *J* = 1.5, 1.5 Hz, 1H), (4.67 (*J* = 1.5, 1.5 Hz, 1H), 4.01-3.96 (m, 1H), 2.21 (m, 1H), 2.14-2.10 (m, 1H), 2.07-1.97 (m, 2H), 1.70-1.42 (m, 7H), 1.18 (s, 3H), 0.87 (s, 9H), 0.021 (s, 3H), 0.019 (s, 3H); <sup>13</sup>C NMR (125 MHz, CDCl<sub>3</sub>) δ 153.1, 106.5, 75.2, 56.1, 45.8, 35.1, 33.3, 31.2, 27.1, 26.3, 24.3, 23.0, 18.4, -4.2, -4.4; LRMS (ES): Mass calcd for C<sub>17</sub>H<sub>32</sub>OSi [M-1]<sup>+</sup>, 279. Found [M-1]<sup>+</sup>, 279. [α]<sub>D</sub>: +1.1 (CHCl<sub>3</sub>, c = 0.63).

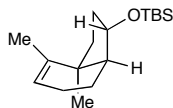

**tert-butyl((1*S*,3*aS*,7*aS*)-3*a*,4-dimethyl-2,3,3*a*,6,7,7*a*-hexahydro-1*H*-inden-1-yloxy)dimethylsilane (8):** To a flame dried Schlenk flask was added alkene **7** (1.43 g, 5.1 mmol) and CH<sub>2</sub>Cl<sub>2</sub> (50 mL, 0.1 M). The solution was then degassed. After degassing, the flask was purged with H<sub>2</sub> using a balloon. H<sub>2</sub> was also bubbled through the solution. The flask was cooled to 0 °C and Crabtree's catalyst (41 mg, 0.051 mmol) was added in one portion. H<sub>2</sub> was bubbled through the solution until the liquid became colorless. The reaction was then allowed to stir under H<sub>2</sub> atmosphere at 20 °C. After 12 hours the solution was concentrated, diluted with diethyl ether, and filtered through silica gel. The solution was concentrated and purified by flash column chromatography with 1% EtOAc in hexanes as an eluent to afford **8** (1.42 g, 99%) as a colorless oil. Analytical data for **8**: IR (film) 2953, 2929, 2857, 1471, 1381, 1260, 835 cm<sup>-1</sup>; <sup>1</sup>H NMR (500 MHz, CDCl<sub>3</sub>) δ 5.28 (m, 1H), 3.92 (dd, *J* = 13.0, 6.6 Hz, 1H), 1.94-1.91 (m, 2H), 1.80-1.73 (m, 1H), 1.66-1.45 (m, 6H), 1.12 (s, 3H), 0.89 (s, 9H), 0.89 (s, 3H), 0.04 (s, 3H), 0.03 (s, 3H); <sup>13</sup>C NMR (125 MHz, CDCl<sub>3</sub>) δ 140.2, 121.6, 75.6, 54.4, 43.1, 35.1, 33.6, 27.4, 26.2, 22.3, 20.3, 19.3, 18.5, -4.1, -4.3; LRMS (EI): Mass calcd for C<sub>17</sub>H<sub>32</sub>OSi [M]<sup>+</sup>, 280. Found [M]<sup>+</sup>, 280; [α]<sub>D</sub>: +40.1 (CHCl<sub>3</sub>, c = 1)

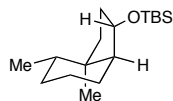

**tert-butyl((1S,3aR,4S,7aS)-3a,4-dimethyloctahydro-1H-inden-1-yloxy)dimethylsilane (10):** To a conical flask was added silyl ether **x** (1.40 g, 5.0 mmol) and 95% EtOH (100 mL, 0.05 M). The solution was then transferred to an H-CUBE (30 °C, H<sub>2</sub> (40 bar)). The solution was concentrated to yield a 6:1 mixture of diastereomers favoring **10**. The material was purified by flash column chromatography with 100% hexanes to 1% EtOAc in hexanes as an eluent to afford **10** (982 mg, 69%) as a colorless oil. Analytical data for **10**: IR (film) 2956, 2928, 2877, 1463, 1382, 1111, 1088, 835 cm<sup>-1</sup>; <sup>1</sup>H NMR (500 MHz, CDCl<sub>3</sub>) δ 4.23-4.21 (m, 1H), 2.02-1.96 (m, 1H), 1.67-1.62 (m, 2H), 1.49-1.36 (m, 10H), 1.25-1.21 (m, 1H), 1.12-1.09 (m, 1H), 0.884 (s, 9H), 0.876 (s, 3H), 0.75 (d, *J* = 6.64 Hz, 3H), 0.04 (s, 3H), 0.03 (s, 3H); <sup>13</sup>C NMR (125 MHz, CDCl<sub>3</sub>) δ 74.4, 55.0, 41.9, 35.6, 35.0, 32.1, 30.7, 21.8, 21.7, 20.0, 18.2; LRMS (ES): Mass calcd for C<sub>17</sub>H<sub>34</sub>OSi [M+1]<sup>+</sup>, 283. Found [M+1]<sup>+</sup>, 283; [α]<sub>D</sub>: +40.5 (CHCl<sub>3</sub>, c = 1)

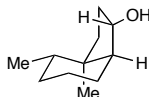

**(1S,3aR,4S,7aS)-3a,4-dimethyloctahydro-1H-inden-1-ol (19):** To a round bottom flask equipped with magnetic stirring bar and rubber septum was added silyl ether **10** (800 mg, 2.8 mmol). The material was diluted with THF (28 mL, 0.1 M) and the flask was cooled to 0 °C in an ice/water bath. TBAF (2.8 mL, 1M in THF) was added slowly. Once TBAF had been fully added the flask was removed from the ice/water bath and allowed to warm to 20 °C. After 6 hours the reaction was diluted with CH<sub>2</sub>Cl<sub>2</sub> and washed with aqueous sat. NH<sub>4</sub>Cl. The layers were separated and the aqueous layer was extracted with CH<sub>2</sub>Cl<sub>2</sub>. The combined organics were washed with aqueous sat. NaCl, dried over Na<sub>2</sub>SO<sub>4</sub>, filtered and concentrated. The material was purified by flash column chromatography with 20% EtOAc in hexanes as an eluent to afford **19** (471 mg, 99%) as a colorless oil. Analytical data for **19**: IR (film) 3325, 2956, 2924, 2867, 1461, 1068 cm<sup>-1</sup>; <sup>1</sup>H NMR (500 MHz, CDCl<sub>3</sub>) δ 4.29 (dddd, *J* = 4.7, 4.7, 8.6, 8.6 Hz, 1H), 2.14-2.12 (m, 1H), 1.69 (m, 2H), 1.55-1.37 (m, 5H), 1.25-1.22 (m, 3H), 1.12 (ddd, *J* = 3.6, 12.8, 12.8 Hz, 1H), 0.90 (s, 3H), 0.76 (d, *J* = 6.7 Hz, 3H); <sup>13</sup>C NMR (125 MHz, CDCl<sub>3</sub>) δ 74.4, 55.7, 42.8, 35.6, 34.6, 31.8, 30.5, 22.0, 21.8, 19.4, 16.7; LRMS (ES): Mass calcd for C<sub>11</sub>H<sub>20</sub>O [M+1]<sup>+</sup>, 169. Found [M+1]<sup>+</sup>, 169; [α]<sub>D</sub>: +7.7 (CHCl<sub>3</sub>, c = 0.13)

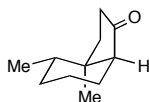

**(3aR,4S,7aS)-3a,4-dimethyloctahydro-1H-inden-1-one (11):** To a flame dried round bottom flask equipped with magnetic stirring bar and rubber septum was added alcohol **19** (400 mg, 2.4 mmol). The material was dissolved in CH<sub>2</sub>Cl<sub>2</sub> (12 mL, 0.2 M) while under N<sub>2</sub> atmosphere. Dess-Martin periodinane (1.12 g, 2.6 mmol) was then added in one portion. After 3 hours the reaction was diluted with 20 mL CH<sub>2</sub>Cl<sub>2</sub> and washed with aqueous 10% Na<sub>2</sub>S<sub>2</sub>O<sub>3</sub>. The layers were separated and the organic layer was washed a second time with aqueous 10% Na<sub>2</sub>S<sub>2</sub>O<sub>3</sub>. The organic layer was washed with aqueous sat. NaCl, dried over Na<sub>2</sub>SO<sub>4</sub>, filtered, and concentrated. The material was purified by flash column chromatography with 5% Et<sub>2</sub>O in pentane as an eluent to afford ketone **11** (391 mg, 98%) as a colorless oil. Analytical data for **11**: IR (film) 2956,

2927, 2861, 1738, 1462  $\text{cm}^{-1}$ ;  $^1\text{H}$  NMR (500 MHz,  $\text{CDCl}_3$ )  $\delta$  2.24 (ddd,  $J = 10.0, 2.40, 1.35$  Hz, 1H), 2.23 (dd,  $J = 10.87, 8.22$  Hz, 1H), 2.07-2.02 (m, 2H), 1.91-1.89 (m, 1H), 1.50-1.35 (m, 4H), 1.18-1.09 (m, 3H), 1.06 (s, 3H), 0.85 (d,  $J = 6.46$  Hz, 3H);  $^{13}\text{C}$  NMR (125 MHz,  $\text{CDCl}_3$ )  $\delta$  220.2, 58.1, 41.8, 34.9, 33.9, 31.4, 29.9, 23.0, 20.5, 20.1, 16.6; LRMS (EI): Mass calcd for  $\text{C}_{11}\text{H}_{18}\text{O}$   $[\text{M}]^+$ , 166. Found  $[\text{M}]^+$ , 166;  $[\alpha]_{\text{D}}$ : +16.59 ( $\text{CHCl}_3$ ,  $c = 1$ ).

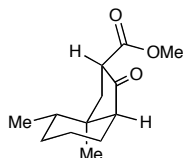

**(2S,3aR,4S,7aS)-methyl 3a,4-dimethyl-1-oxooctahydro-1H-indene-2-carboxylate (20):** To a flame dried round bottom flask equipped with magnetic stirring bar and rubber septum at  $0^\circ\text{C}$  was added LDA (1.51 mL, 1.09 M in THF/hexanes) from a stock solution. The flask was cooled to  $-78^\circ\text{C}$  and a solution of ketone **11** (300 mg, 1.8 mmol) in THF (9 mL, 0.2 M) in a flame-dried conical vial was added dropwise through a cannula. After the addition of **11** had completed the reaction was allowed to stir for 60 minutes at  $-78^\circ\text{C}$ . A solution of Mander's reagent (198  $\mu\text{L}$ , 2.5 mmol) in THF (2 mL, 1.25 M) in a flame-dried conical flask was added dropwise to the enolate. The reaction was allowed to stir for three hours at  $-78^\circ\text{C}$  under  $\text{N}_2$  atmosphere. Upon consumption of starting material, to the reaction was added aqueous sat.  $\text{NH}_4\text{Cl}$  (5 mL). The solution was poured into a separatory funnel containing  $\text{CH}_2\text{Cl}_2$  (30 mL). The flask was rinsed with  $\text{CH}_2\text{Cl}_2$  (2 x 5 mL) and the material was extracted. The layers were separated and the organic layer was washed with aqueous sat. NaCl, dried over  $\text{Na}_2\text{SO}_4$ , filtered, and concentrated. The material was purified by flash column chromatograph with 5%  $\text{Et}_2\text{O}$  in pentane as an eluent to afford **20** and its enol tautomer (295 mg, 73%) as a colorless oil. Analytical data for **20**: IR (film) 3388, 2958, 2929, 2855, 1755, 1728  $\text{cm}^{-1}$ ;  $^1\text{H}$  NMR (500 MHz,  $\text{CDCl}_3$ )  $\delta$  3.73 (s, 3H), 3.28 (dd,  $J = 11.07, 8.75$  Hz, 1H), 2.35 (dd,  $J = 13.32, 8.74$  Hz, 1H), 2.13-2.12 (m, 1H), 2.09-2.06 (m, 1H), 1.87 (dd,  $J = 13.3, 11.1$  Hz, 1H), 1.52-1.37 (m, 4H), 1.14-1.05 (m, 2H), 1.11 (s, 3H), 0.87 (d,  $J = 6.39$  Hz, 3H);  $^{13}\text{C}$  NMR (125 MHz,  $\text{CDCl}_3$ )  $\delta$  211.8, 170.5, 58.0, 52.5, 52.1, 39.9, 35.9, 35.0, 29.6, 22.9, 20.5, 19.6, 16.4; LRMS (ES): Mass calcd for  $\text{C}_{13}\text{H}_{20}\text{O}_3$   $[\text{M}+1]^+$ , 225. Found  $[\text{M}+1]^+$ , 225;  $[\alpha]_{\text{D}}$ : +33.6 ( $\text{CHCl}_3$ ,  $c = 0.64$ ).

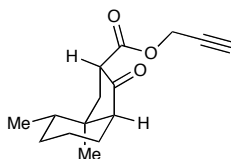

**(2S,3aR,4S,7aS)-prop-2-ynyl 3a,4-dimethyl-1-oxooctahydro-1H-indene-2-carboxylate (12):** To a round bottom flask equipped with magnetic stirring bar was added 4Å ms. The flask was flame dried and equipped with a rubber septum. To the flask was added toluene (3 mL) through a syringe. The septum was removed briefly and DMAP (9 mg, 0.07 mmol) was added. Propargyl alcohol (322  $\mu\text{L}$ , 5.5 mmol), which was distilled over  $\text{CaH}_2$ , was added through a syringe. A solution of **18** (246 mg, 1.1 mmol) in toluene (2 mL, 0.55 M) was added through a cannula to the reaction vessel. The septum was removed and quickly replaced with a reflux condenser. The reaction was heated to  $100^\circ\text{C}$  under  $\text{N}_2$  atmosphere. After 30 hours the reaction was cooled to  $20^\circ\text{C}$  and aqueous sat.  $\text{NH}_4\text{Cl}$  (3 mL) was added. The solution was extracted  $\text{CH}_2\text{Cl}_2$  (2 x 20 mL). The combined organic layers were washed with aqueous sat. NaCl, dried

over Na<sub>2</sub>SO<sub>4</sub>, filtered, and concentrated. The material was purified by flash column chromatography with 10% Et<sub>2</sub>O in pentane to 30% Et<sub>2</sub>O in pentane to afford **12** as a 9:1 mixture of diastereomers and its enol tautomer (200 mg, 82%) as a light yellow oil. Analytical data for **12**: IR (film) 3275, 2961, 2931, 2851, 1756, 1733, 1463, 1141 cm<sup>-1</sup>; <sup>1</sup>H NMR (500 MHz, CDCl<sub>3</sub>) δ 4.74 (d, *J* = 2.48 Hz, 1H), 4.71 (d, *J* = 2.51 Hz, 1H), 3.32 (dd, *J* = 11.2, 8.7 Hz, 1H), 2.49 (dd, *J* = 2.5, 2.5 Hz, 1H), 2.39 (dd, *J* = 13.3, 8.7 Hz, 1H), 2.14-2.13 (m, 1H), 2.10-2.06 (m, 1H), 1.88 (dd, *J* = 13.3, 11.7 Hz, 1H), 1.53-1.37 (m, 4H), 1.12-1.08 (m, 2H), 1.11 (s, 3H), 0.87 (d, *J* = 6.41, Hz, 3H); <sup>13</sup>C NMR (125 MHz, CDCl<sub>3</sub>) δ 211.1, 169.3, 77.2, 75.2, 58.1, 52.8, 52.0, 40.0, 36.0, 35.0, 29.6, 22.9, 20.5, 19.6, 16.4; LRMS (ES): Mass calcd for C<sub>15</sub>H<sub>20</sub>O<sub>3</sub> [M+1]<sup>+</sup>, 249. Found [M+1]<sup>+</sup>, 249. [α]<sub>D</sub>: +29.5 (CHCl<sub>3</sub>, c = 1.0).

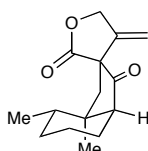

**(2'S,3a'R,4'S,7a'S)-3a',4'-dimethyl-4-methylenedecahydro-2H-spiro[furan-3,2'-indene]-1',2'(3'H)-dione (13)**: To flame dried flask equipped with magnetic stirring bar was added Mn(OAc)<sub>3</sub>•H<sub>2</sub>O (627 mg, 2.7 mmol) and degassed (freeze-pump-thaw) absolute ethanol (4 mL). A solution of ester **12** (200 mg, 0.9 mmol) in degassed absolute ethanol (6 mL, 0.15 M) was transferred dropwise to the reaction vessel through a cannula. After 20 hours the reaction was filtered through a mixture of SiO<sub>2</sub> and celite with Et<sub>2</sub>O as the eluent. The material was concentrated and purified by flash column chromatography with 10% EtOAc in hexanes to 20% EtOAc in hexanes as an eluent to afford **13** (140 mg, 70%) as a colorless oil. Analytical data for **13**: IR (film) 2961, 2931, 2850, 1779, 1734, 1461, 1266, 1139 cm<sup>-1</sup>; <sup>1</sup>H NMR (500 MHz, CDCl<sub>3</sub>) δ 5.15-5.14 (m, 1H), 5.08-5.07 (m, 1H), 5.02 (ddd, *J* = 12.8, 2.5, 2.5 Hz, 1H), 4.82 (ddd, *J* = 12.8, 1.6, 1.6 Hz, 1H), 2.64 (d, *J* = 14.4 Hz, 1H), 2.41-2.40 (m, 1H), 1.98-1.94 (m, 1H), 1.69 (d, *J* = 14.4 Hz, 1H), 1.61-1.41 (m, 3H), 1.26-1.24 (m, 1H), 1.22 (dddd, *J* = 13.9, 3.9, 3.9, 0.2 Hz, 1H), 1.16 (s, 3H), 1.12 (dd, *J* = 12.2, 2.9 Hz, 1H), 0.94 (d, *J* = 6.6 Hz, 3H); <sup>13</sup>C NMR (125 MHz, CDCl<sub>3</sub>) δ 208.1, 175.1, 145.8, 106.9, 70.7, 61.3, 54.9, 40.7, 38.9, 35.4, 29.7, 22.1, 20.0, 19.8, 16.3; LRMS (EI): Mass calcd for C<sub>15</sub>H<sub>20</sub>O<sub>3</sub> [M]<sup>+</sup>, 248. Found [M]<sup>+</sup>, 248; [α]<sub>D</sub>: +24.6 (CHCl<sub>3</sub>, c = 0.1).

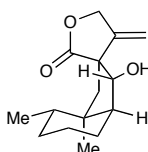

**(1'R,2'S,3a'R,4'S,7a'S)-1'-hydroxy-3a',4'-dimethyl-4-methylenedecahydro-2H-spiro[furan-3,2'-inden]-2-one (14)**: To flame-dried flask was added samarium (692 mg, 4.6 mmol) and THF (4.6 mL, distilled over benzophenone/sodium). 1,2-diiodoethane (1.18 g, 4.2 mmol) was added in one portion. After 3 hours the reaction became a deep blue color and H<sub>2</sub>O (327 μL, 18.2 mmol) was added. Upon the addition of water the blue solution became purple. Immediately, a solution of ketone **13** (130 mg, 0.52 mmol) in THF (10.4 mL, 0.05 M) was added dropwise to SmI<sub>2</sub> through a cannula. After 2 hours the reaction was diluted with diethyl ether (30 mL) and washed with H<sub>2</sub>O (5 mL). The layers were separated and the aqueous layer was extracted with diethyl ether (2 x 20 mL). The combined organic layers were washed with aqueous sat.



NaHCO<sub>3</sub>, and then aqueous sat. NaCl. The material was dried over Na<sub>2</sub>SO<sub>4</sub>, filtered, and concentrated. The material was purified by flash column chromatography with 40% EtOAc in hexanes as an eluent to afford **14** (116 mg, 89%) as a white solid. Analytical data for **14**: mp = 107-109 °C; IR (film) 3433, 2957, 2929, 2857, 1755, 1460, 1354 cm<sup>-1</sup>; <sup>1</sup>H NMR (500 MHz, CDCl<sub>3</sub>) δ 5.30 (bs, 1H), 5.13 (bs, 1H), 4.88 (dddd, *J* = 12.8, 2.6, 2.6, 0.8 Hz, 1H), 4.74 (dddd, *J* = 12.8, 1.7, 1.7, 1.7 Hz, 1H), 4.50 (dd, *J* = 10.9, 10.9, 1H), 2.40 (dd, *J* = 14.6, 1.2 Hz, 1H), 1.80-1.42 (m, 8H), 1.15-1.07 (m, 1H), 0.98 (s, 3H), 0.84 (d, *J* = 6.7 Hz, 3H); <sup>13</sup>C NMR (125 MHz, CDCl<sub>3</sub>) δ 182.4, 148.2, 109.0, 80.7, 71.8, 55.8, 52.7, 47.3, 38.9, 35.9, 30.7, 21.3, 21.0, 20.2, 16.6; LRMS (ES): Mass calcd for C<sub>15</sub>H<sub>22</sub>O<sub>3</sub> [M+1]<sup>+</sup>, 251. Found [M+1]<sup>+</sup>, 251. [α]<sub>D</sub>: +52.1 (CHCl<sub>3</sub>, c = 1.3).

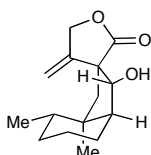

**(1'R,2'R,3a'R,4'S,7a'S)-1'-hydroxy-3a',4'-dimethyl-4-methylenedecahydro-2H-spiro[furan-3,2'-inden]-2-one (bakkenolide S) (15)**: To round bottom flask equipped with magnetic stirring bar was added alcohol **14** (20 mg, 0.08 mmol). The flask was sealed with a rubber septum and equipped with a N<sub>2</sub> inlet. The material was diluted with THF (2 mL) and cooled to 0 °C in an ice/water bath. TBAF (100 μL, 1M in THF) was added dropwise. After 40 minutes of stirring at 0 °C under N<sub>2</sub> atmosphere, to the reaction was added H<sub>2</sub>O (2 mL). The solution was diluted with EtOAc (10 mL) and extracted. The layers were separated and the aqueous layer was extracted a second time with EtOAc (10 mL). The combined organic layers were washed with aqueous 10% NaHCO<sub>3</sub>, followed by aqueous sat. NaCl. The solution was dried over Na<sub>2</sub>SO<sub>4</sub>, filtered, and concentrated. The material was purified by flash column chromatography with 30% EtOAc in hexanes to 40% EtOAc in hexanes as a gradient to afford **15** (14.4 mg, 72%) as 5:1 mixture of **15** to **14**. Analytical data for **15**: mp = 130-133 °C; IR (film) 3436, 2958, 2931, 2872, 1758, 1446, 1163 cm<sup>-1</sup>; <sup>1</sup>H NMR (500 MHz, CDCl<sub>3</sub>) δ 5.13-5.11 (m, 2H), 4.90 (ddd, *J* = 12.8, 2.4, 2.4 Hz, 1H), 4.80 (ddd, *J* = 12.8, 1.8, 1.8 Hz, 1H), 4.21 (dd, *J* = 10.0, 7.5 Hz, 1H), 2.09 (d, *J* = 14.4 Hz, 1H), 2.09-2.05 (m, 1H), 1.90 (d, *J* = 14.3 Hz, 1H), 1.72-1.68 (m, 1H), 1.60-1.40 (m, 4H), 1.25-1.20 (m, 2H), 1.01 (s, 3H), 0.85 (d, *J* = 6.7 Hz, 3H); <sup>13</sup>C NMR (125 MHz, CDCl<sub>3</sub>) δ 180.1, 149.8, 106.3, 82.4, 70.9, 56.6, 52.8, 46.4, 40.3, 36.4, 30.8, 21.1, 20.9, 19.7, 16.4; LRMS (ES): Mass calcd for C<sub>15</sub>H<sub>22</sub>O<sub>3</sub> [M+1]<sup>+</sup>, 251. Found [M+1]<sup>+</sup>, 251; [α]<sub>D</sub>: -29.2 (MeOH, c = 0.23)

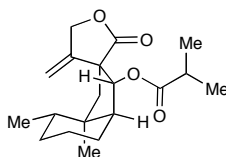

**(1'R,2'R,3a'R,4'S,7a'S)-3a',4'-dimethyl-4-methylene-2-oxodecahydro-2H-spiro[furan-3,2'-indene]-1'-yl isobutyrate (bakkenolide I) (16)**: To round bottom flask equipped with magnetic stirring bar was added alcohol **14** (10 mg, 0.04 mmol). The flask was sealed with a rubber septum and equipped with a N<sub>2</sub> inlet. The material was diluted with THF (1 mL, 0.04 M) and cooled to 0 °C in an ice/water bath. TBAF (50 μL, 1M in THF) was added dropwise. After 40 minutes, to the reaction was added Et<sub>3</sub>N (53 mL, 0.38 mmol) through a syringe. *iso*-Butyryl

chloride (32  $\mu\text{L}$ , 0.3 mmol) was added through a syringe followed by DMAP (5 mg, 0.04 mmol). The reaction was allowed to warm to 20  $^{\circ}\text{C}$ . After 40 hours the reaction was diluted with  $\text{Et}_2\text{O}$  (10 mL) and washed with aqueous sat. NaCl (3 mL). The layers were separated and the aqueous layer was extracted with  $\text{Et}_2\text{O}$  (2 x 10 mL). The combined organic layers were washed with aqueous sat. NaCl, dried over  $\text{MgSO}_4$ , filtered, and concentrated. The material was purified by flash column chromatography with 5% EtOAc in hexanes to 10% EtOAc in hexanes to afford **16** (8.8 mg, 69%). Analytical data for **16**: IR (film) 2962, 2928, 2856, 1780, 1738, 1466, 1159  $\text{cm}^{-1}$ ;  $^1\text{H}$  NMR (500 MHz,  $\text{CDCl}_3$ )  $\delta$  5.44 (d,  $J = 11.7$  Hz, 1H), 5.20 (dd,  $J = 2.7, 2.7$  Hz, 1H), 5.14 (dd,  $J = 3.2, 3.2$  Hz, 1H), 4.69 (ddd,  $J = 13.0, 1.8, 1.8$  Hz, 1H), 4.66 (ddd,  $J = 13.0, 2.4, 2.4$ , 1H), 2.58-2.52 (m, 1H), 2.36-2.33 (m, 1H), 2.19 (d,  $J = 14.3$  Hz, 1H), 1.96 (d,  $J = 14.3$  Hz, 1H), 1.53-1.50 (m, 5H), 1.38-1.34 (m, 1H), 1.22-1.18 (m, 1H), 1.16 (d,  $J = 7.0$  Hz, 3H), 1.15 (d,  $J = 6.9$  Hz, 3H), 1.04 (s, 3H), 0.88 (d,  $J = 6.6$  Hz, 3H);  $^{13}\text{C}$  NMR (125 MHz,  $\text{CDCl}_3$ )  $\delta$  178.4, 172.7, 148.3, 107.8, 82.8, 70.6, 54.2, 49.7, 47.2, 43.4, 40.1, 36.2, 30.7, 25.5, 22.3, 22.3, 21.2, 20.9, 19.5, 16.3; LRMS (ES): Mass calcd for  $\text{C}_{19}\text{H}_{28}\text{O}_4$   $[\text{M}+\text{H}_2\text{O}]^+$ , 338. Found  $[\text{M}+\text{H}_2\text{O}]^+$ , 338.  $[\alpha]_{\text{D}}$ :  $-5.3$  (MeOH,  $c = 0.53$ ).

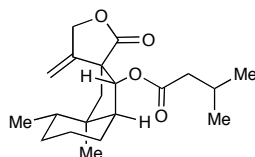

**(1'R,2'R,3a'R,4'S,7a'S)-3a',4'-dimethyl-4-methylene-2-oxodecahydro-2H-spiro[furan-3,2'-indene]-1'-yl 3-methylbutanoate (bakkenolide J) (17)**: To round bottom flask equipped with magnetic stirring bar was added alcohol **14** (20 mg, 0.08 mmol). The flask was sealed with a rubber septum and equipped with a  $\text{N}_2$  inlet. The material was diluted with THF (2 mL, 0.04 M) and cooled to 0  $^{\circ}\text{C}$  in an ice/water bath. TBAF (100  $\mu\text{L}$ , 1M in THF) was added dropwise. After 40 minutes, to the reaction was added  $\text{Et}_3\text{N}$  (106 mL, 0.72 mmol) through a syringe. *iso*-Valeryl chloride (74  $\mu\text{L}$ , 0.6 mmol) was added through a syringe followed by DMAP (10 mg, 0.08 mmol). The reaction was allowed to warm to 20  $^{\circ}\text{C}$ . After 40 hours the reaction was diluted with  $\text{Et}_2\text{O}$  (20 mL) and washed with aqueous sat. NaCl (6 mL). The layers were separated and the aqueous layer was extracted with  $\text{Et}_2\text{O}$  (2 x 10 mL). The combined organic layers were washed with aqueous sat. NaCl, dried over  $\text{MgSO}_4$ , filtered, and concentrated. The material was purified by flash column chromatography with 5% acetone in hexanes to afford **17** (17 mg, 64%). Analytical data for **17**: IR (film) 2961, 2930, 2872, 1780, 1738, 1464, 1163  $\text{cm}^{-1}$ ;  $^1\text{H}$  NMR (500 MHz,  $\text{CDCl}_3$ )  $\delta$  5.46 (d,  $J = 11.6$  Hz, 1H), 5.21 (bs, 1H), 5.14 (bs, 1H), 4.73-4.65 (m, 2H), 2.36 (ddd,  $J = 3.8, 11.5, 3.8$  Hz, 1H), 2.20 (d,  $J = 7.39$  Hz, 2H), 2.19 (d,  $J = 14.4$  Hz, 1H), 2.12-2.01 (m, 1H), 1.96 (d,  $J = 14.3$  Hz, 1H), 1.54-1.48 (m, 4H), 1.40-1.38 (m, 1H), 1.25-1.14 (m, 2H), 1.04 (s, 3H), 0.93 (d,  $J = 6.6$  Hz, 3H), 0.93 (d,  $J = 6.6$  Hz, 3H), 0.88 (d,  $J = 6.6$  Hz, 3H);  $^{13}\text{C}$  NMR (125 MHz,  $\text{CDCl}_3$ )  $\delta$  178.4, 172.7, 148.3, 107.8, 82.8, 70.6, 54.2, 49.7, 47.2, 43.4, 40.1, 36.2, 30.7, 25.5, 22.3, 22.3, 21.2, 20.9, 19.5, 16.3; LRMS (ES): Mass calcd for  $\text{C}_{20}\text{H}_{30}\text{O}_4$   $[\text{M}+1]^+$ , 335. Found  $[\text{M}+1]^+$ , 335.  $[\alpha]_{\text{D}}$ :  $-26.9$  (MeOH,  $c = 0.26$ ).

## Selected NMR Spectra

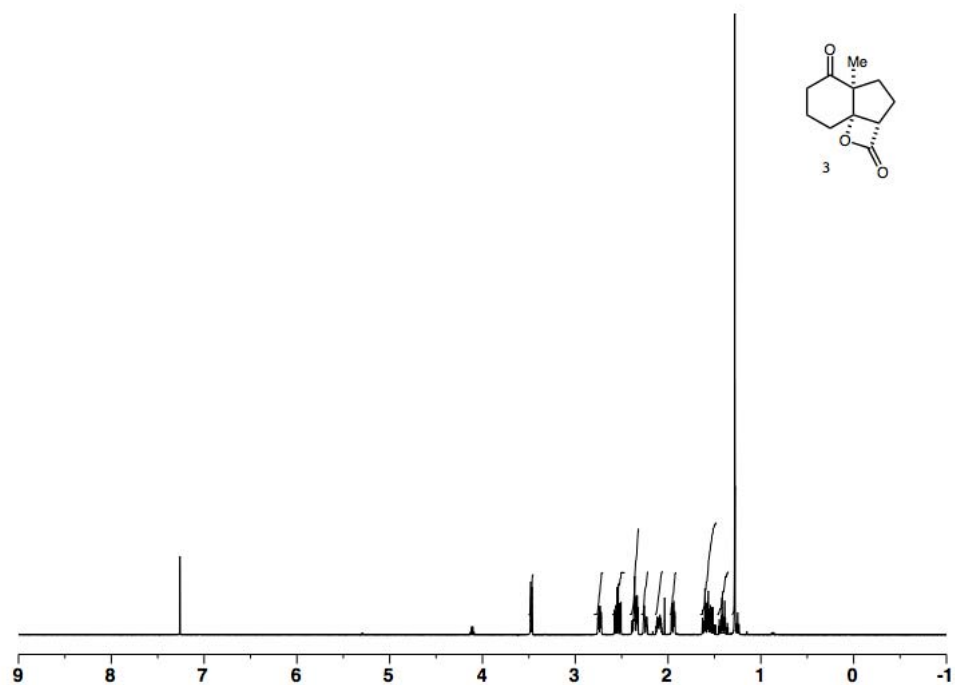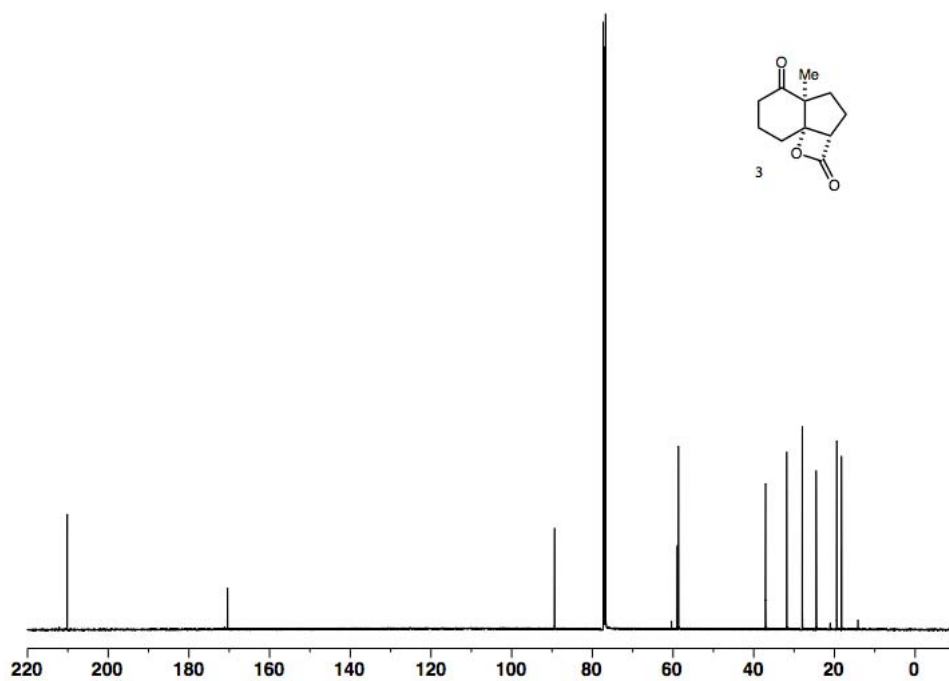

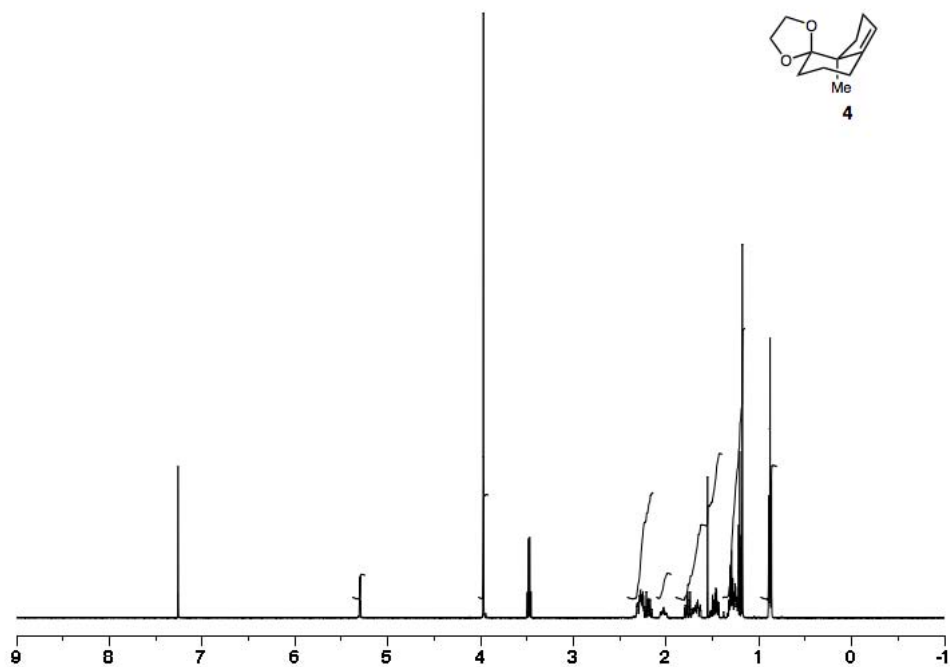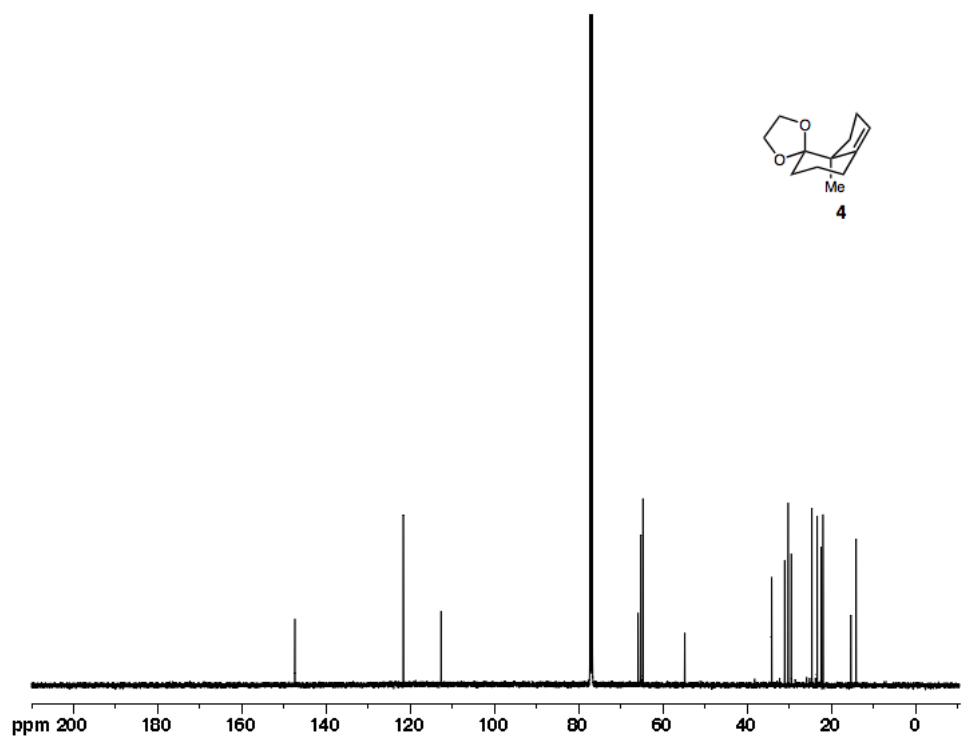

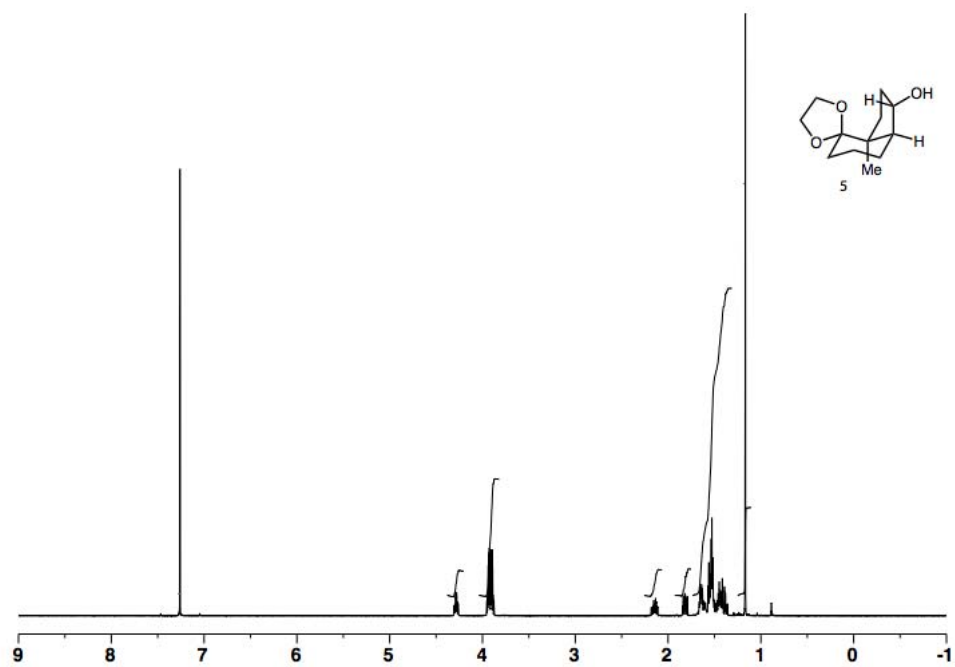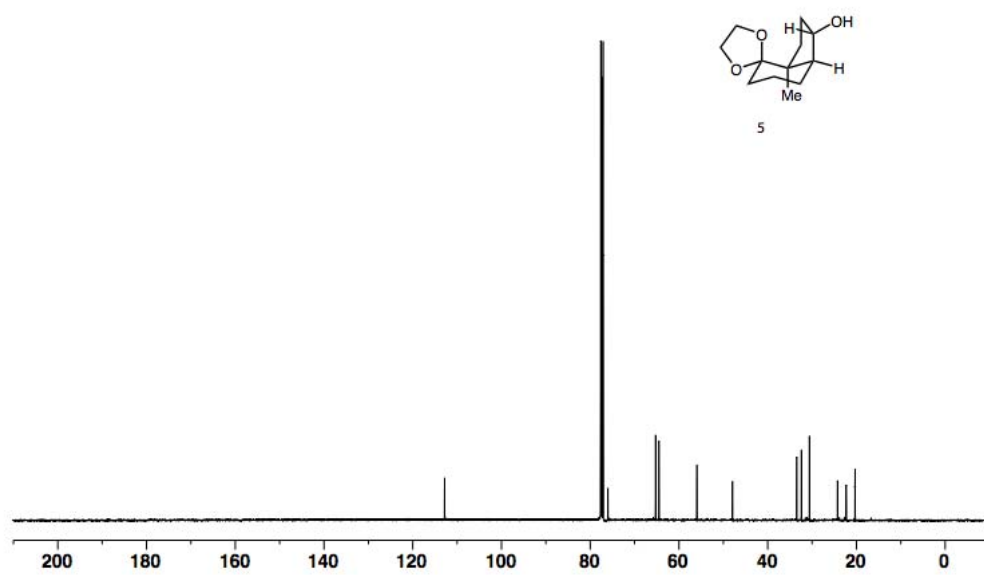

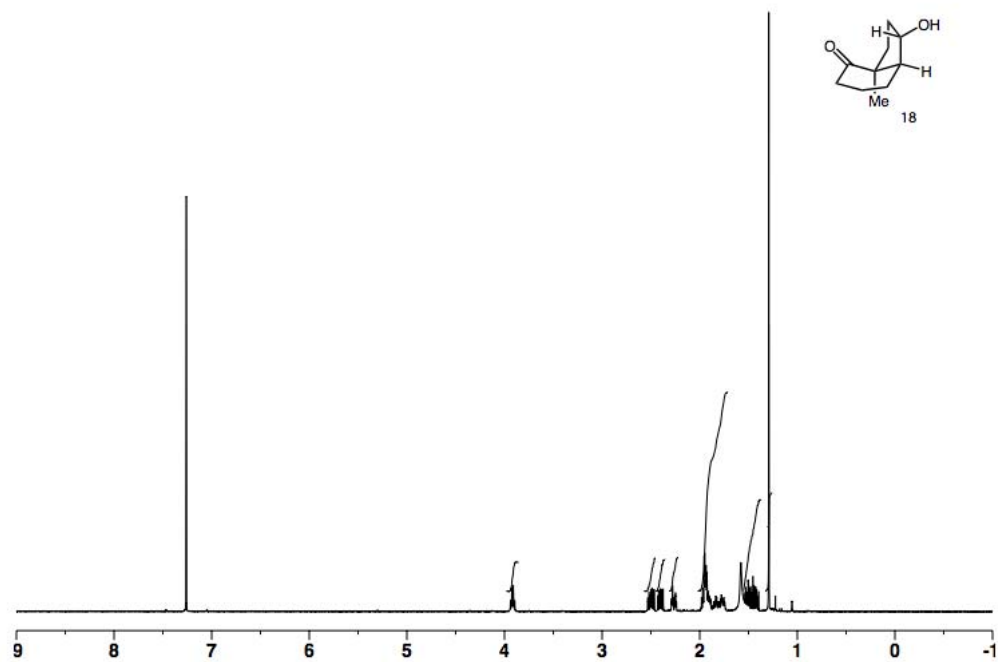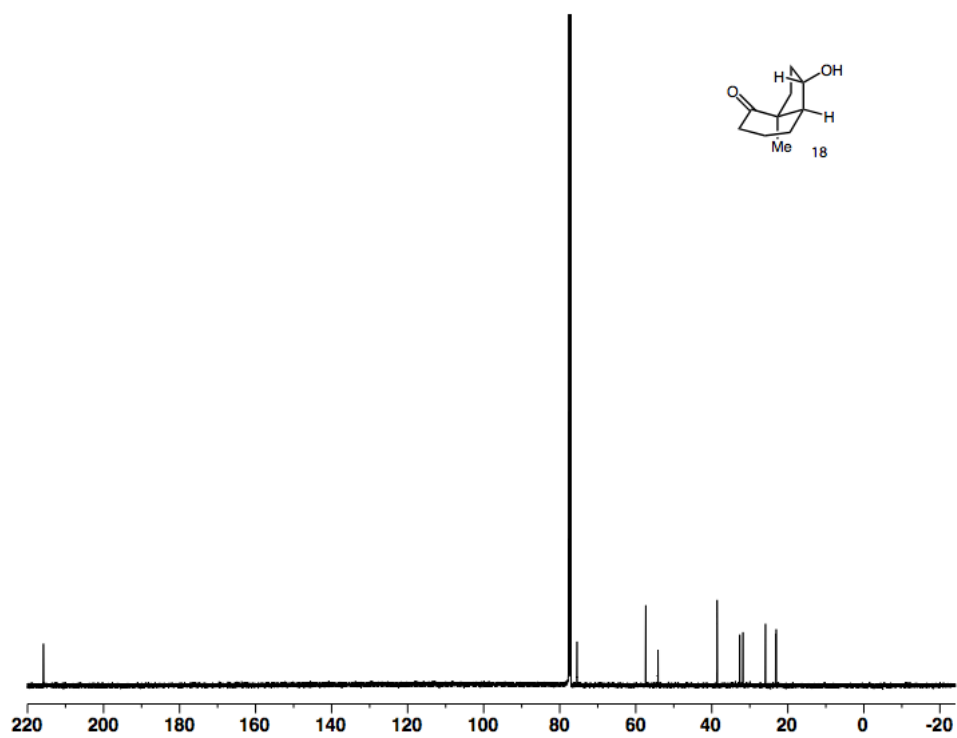

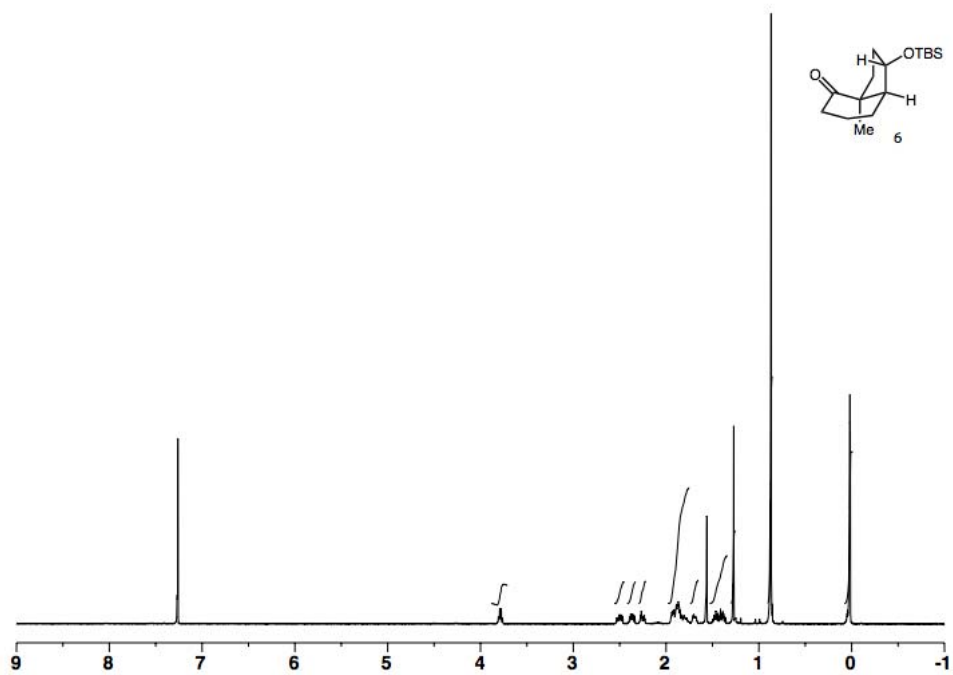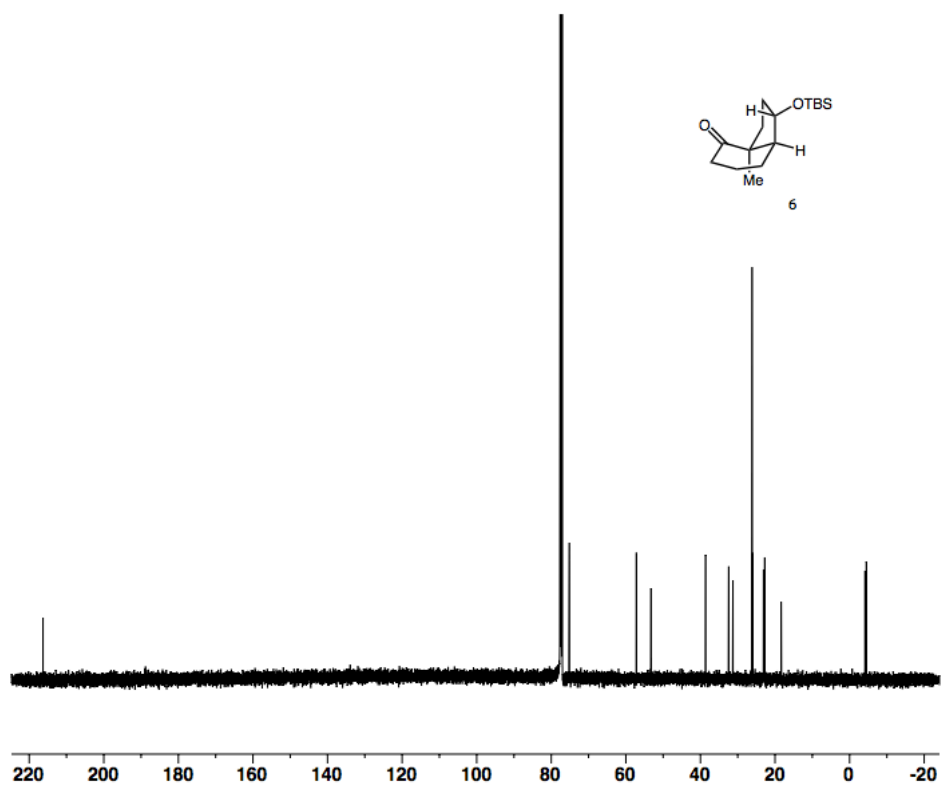

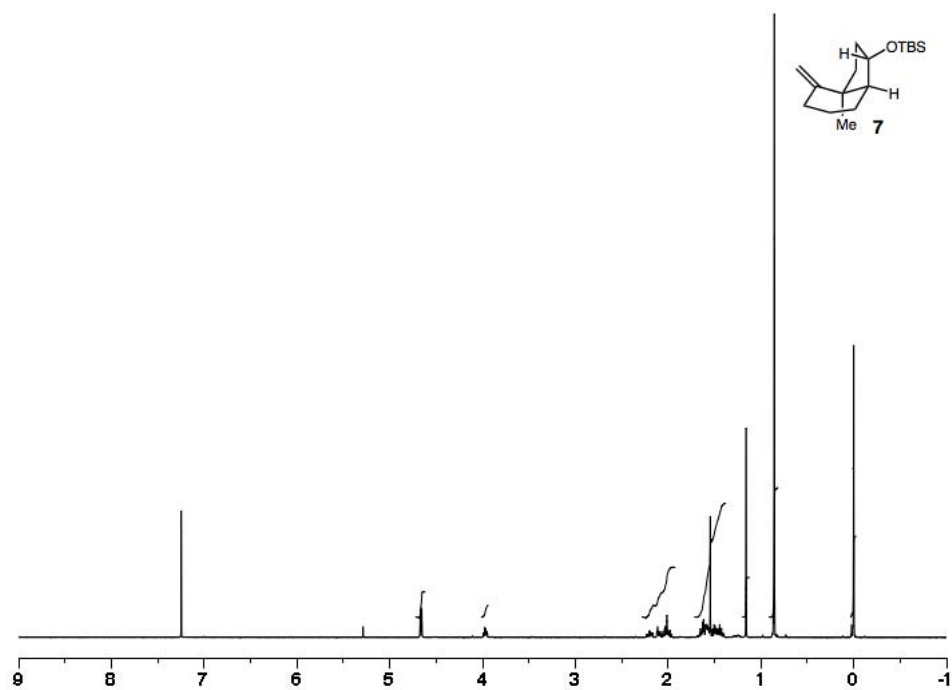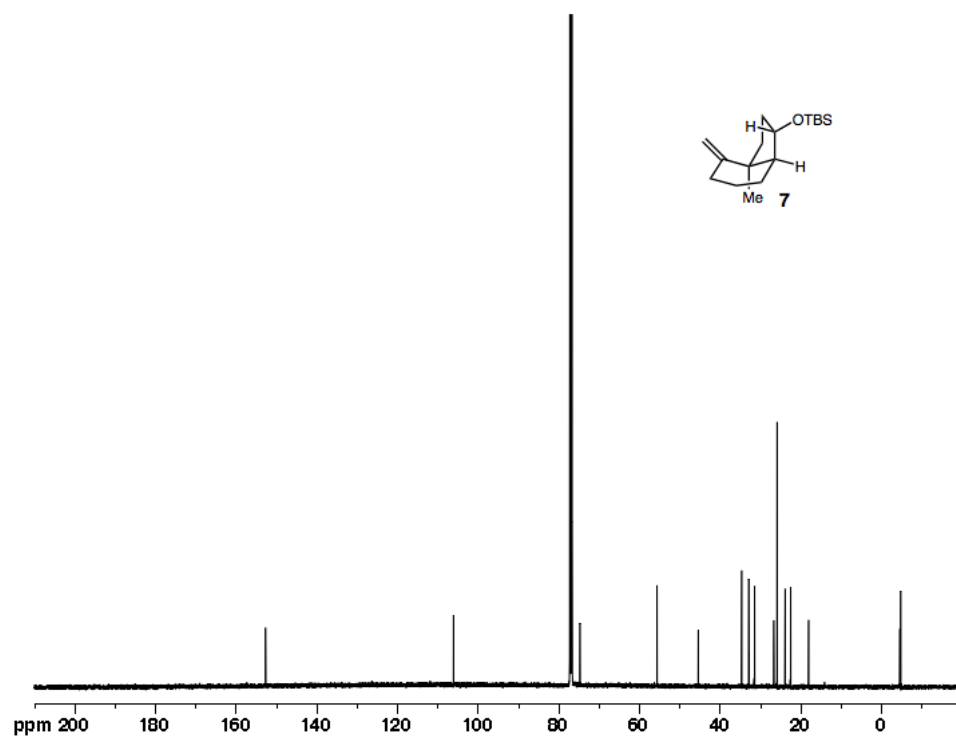



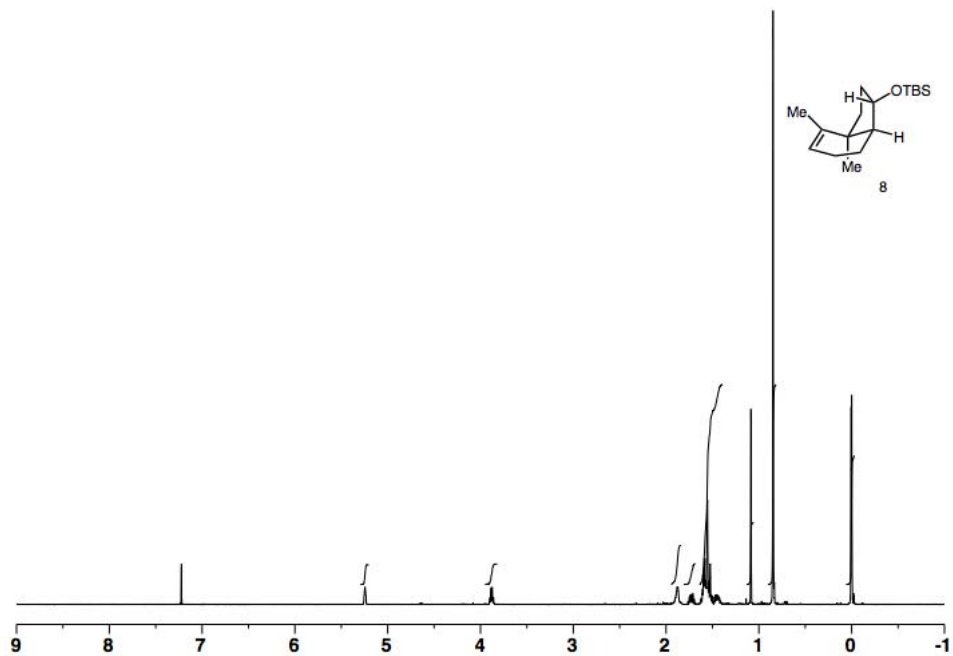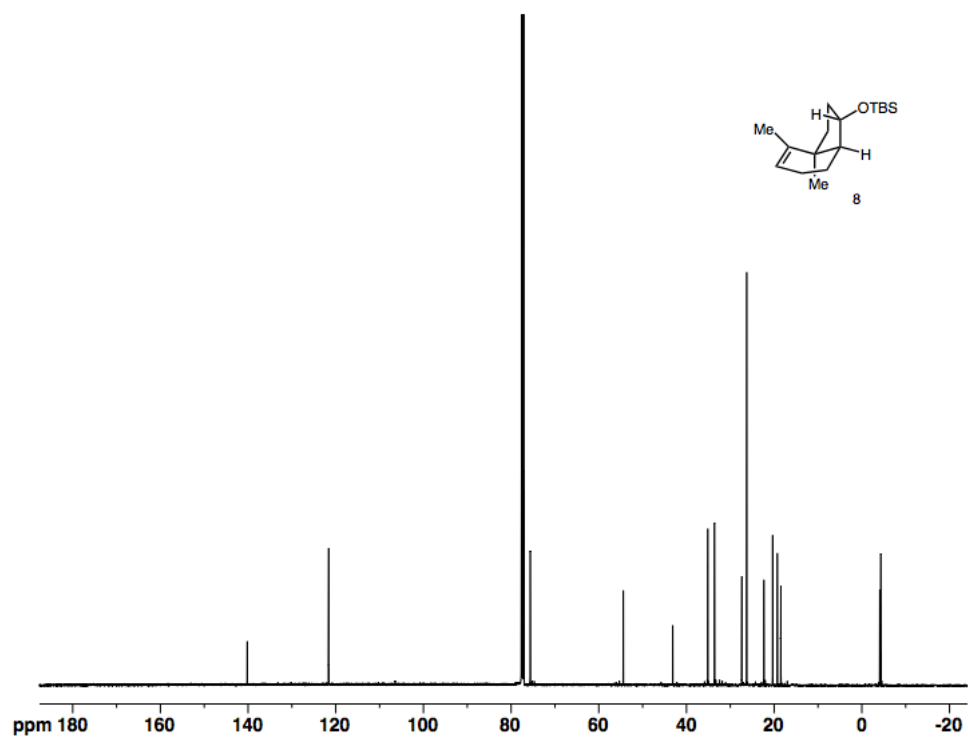

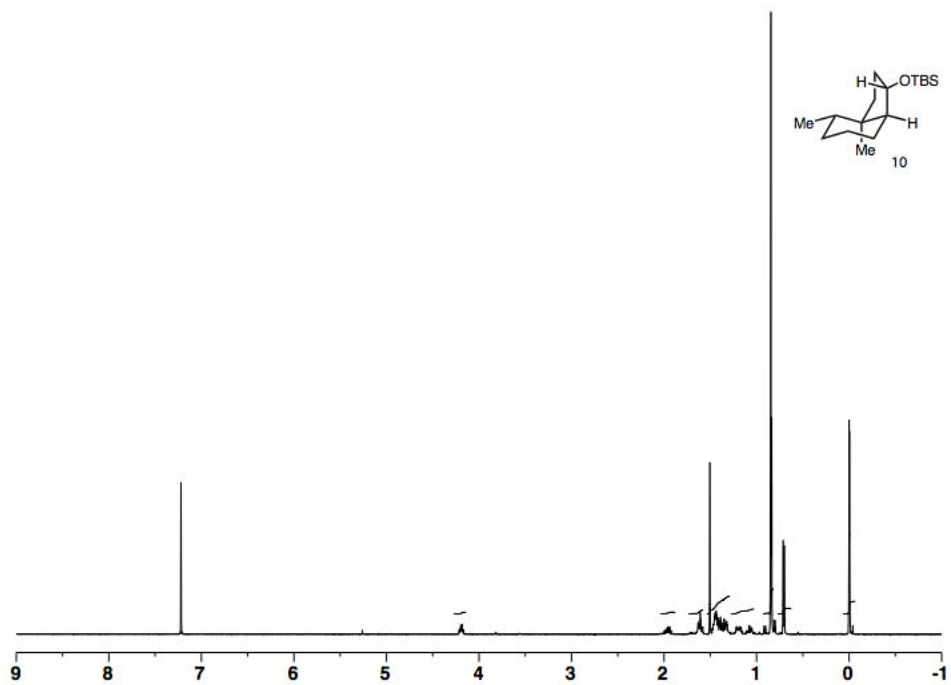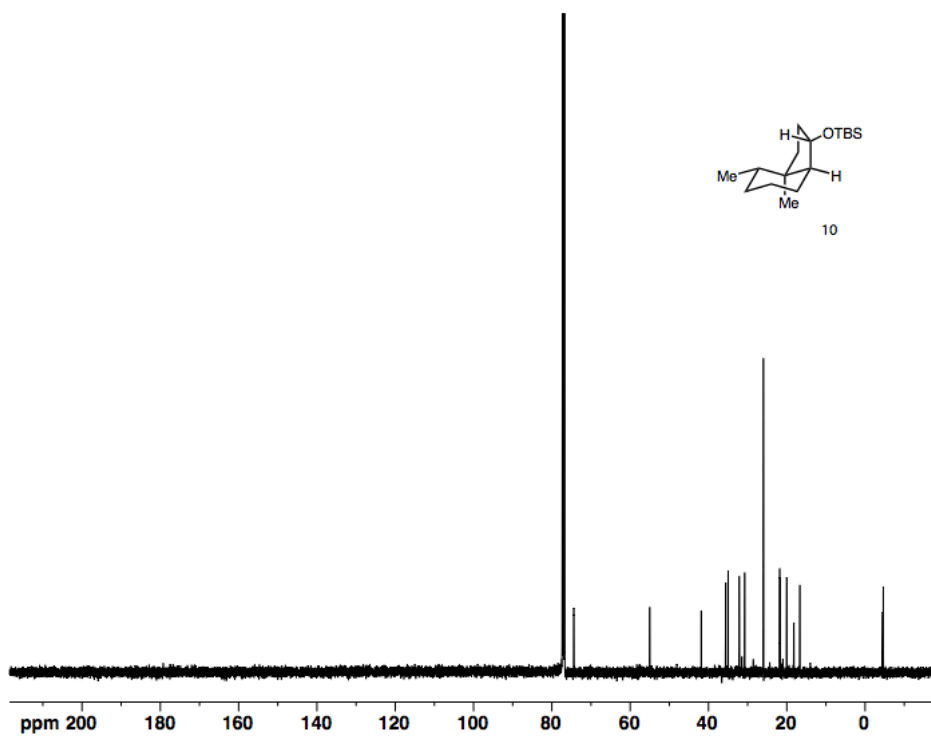

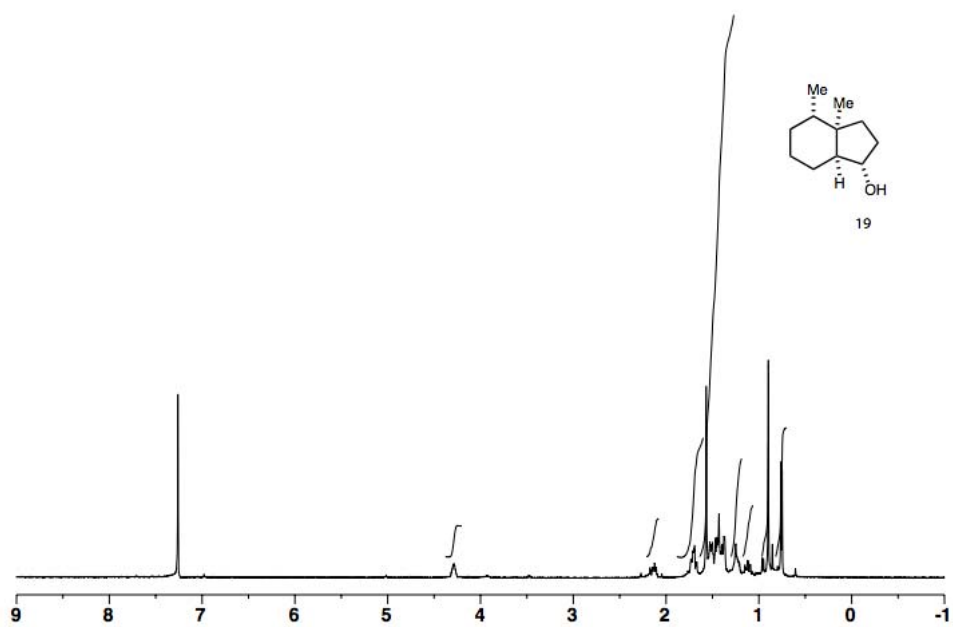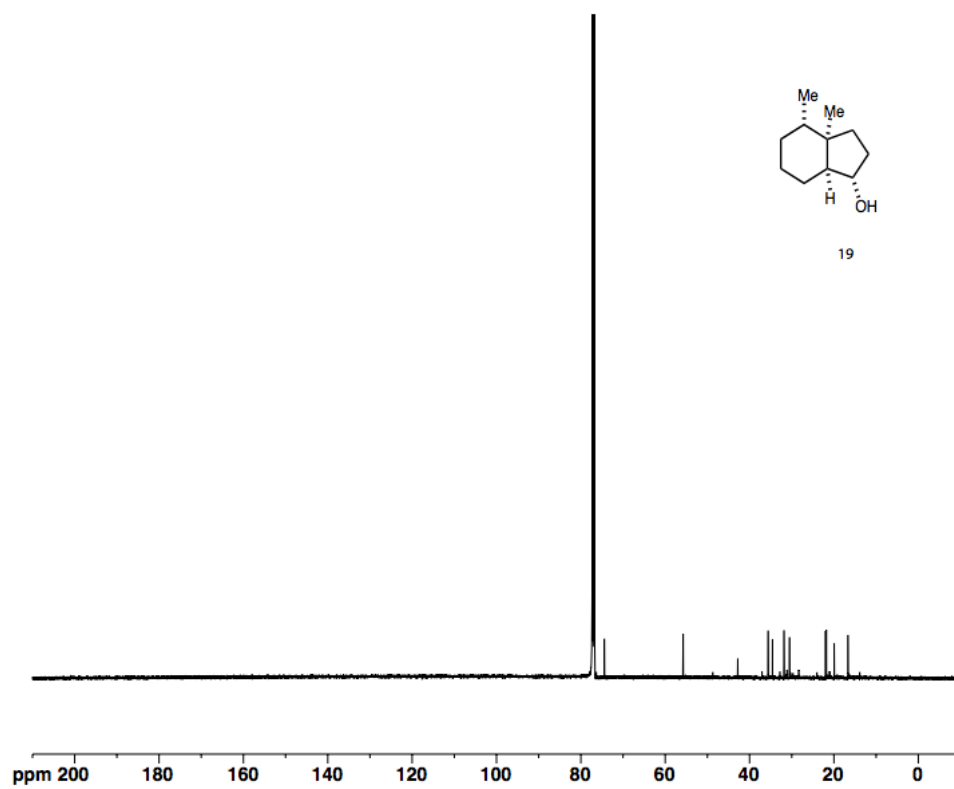

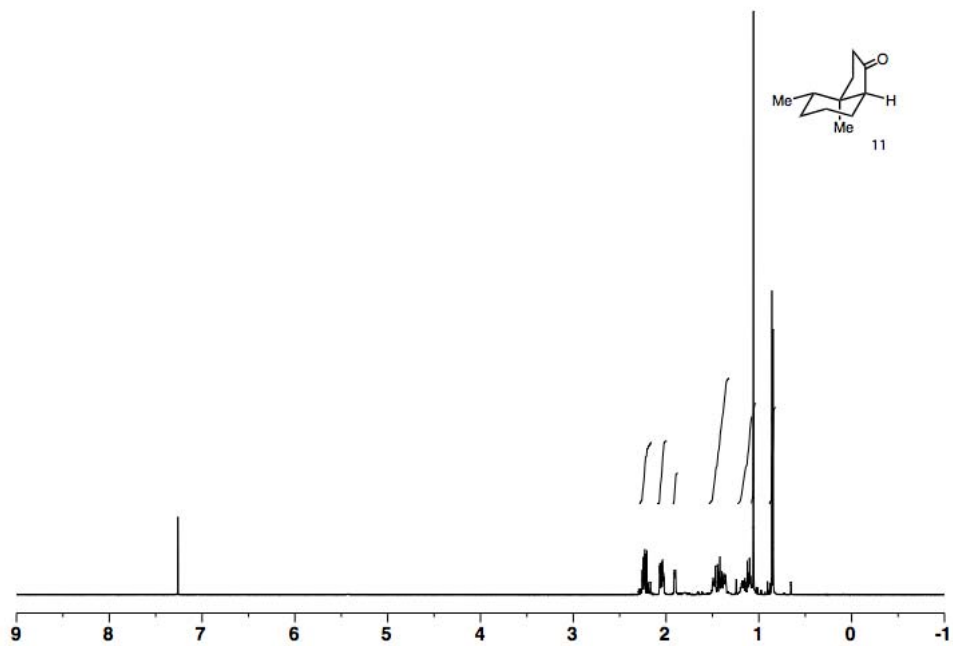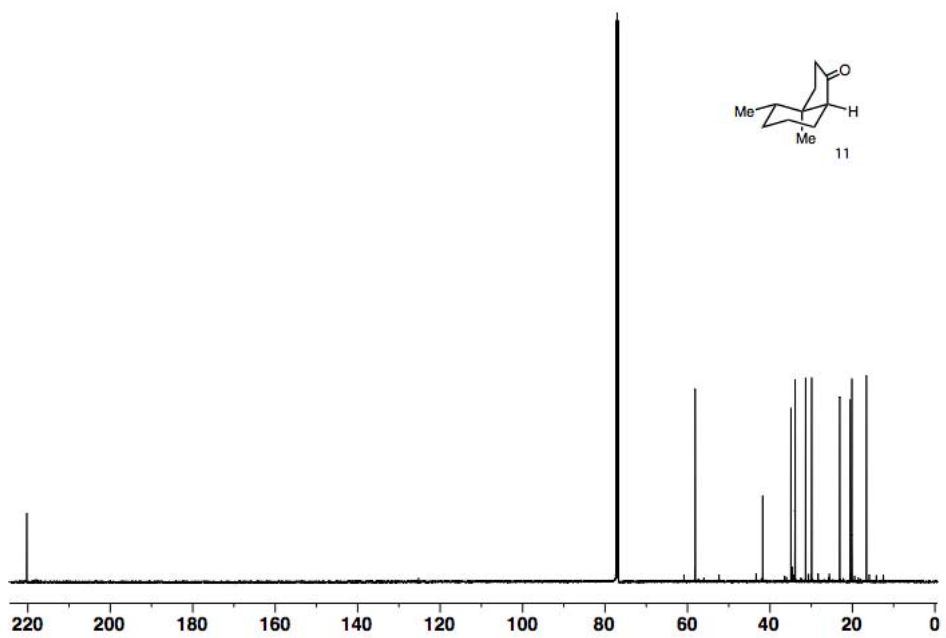

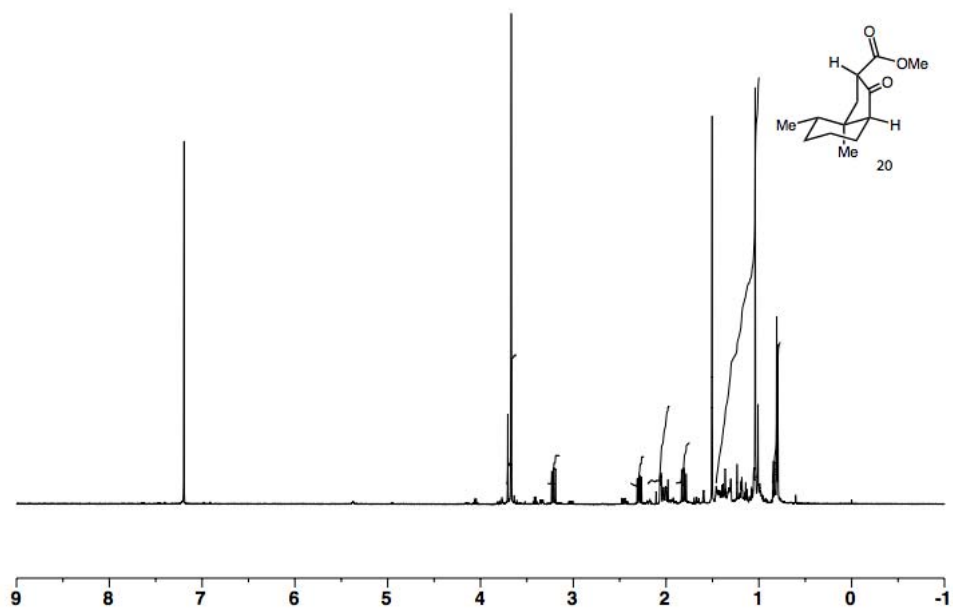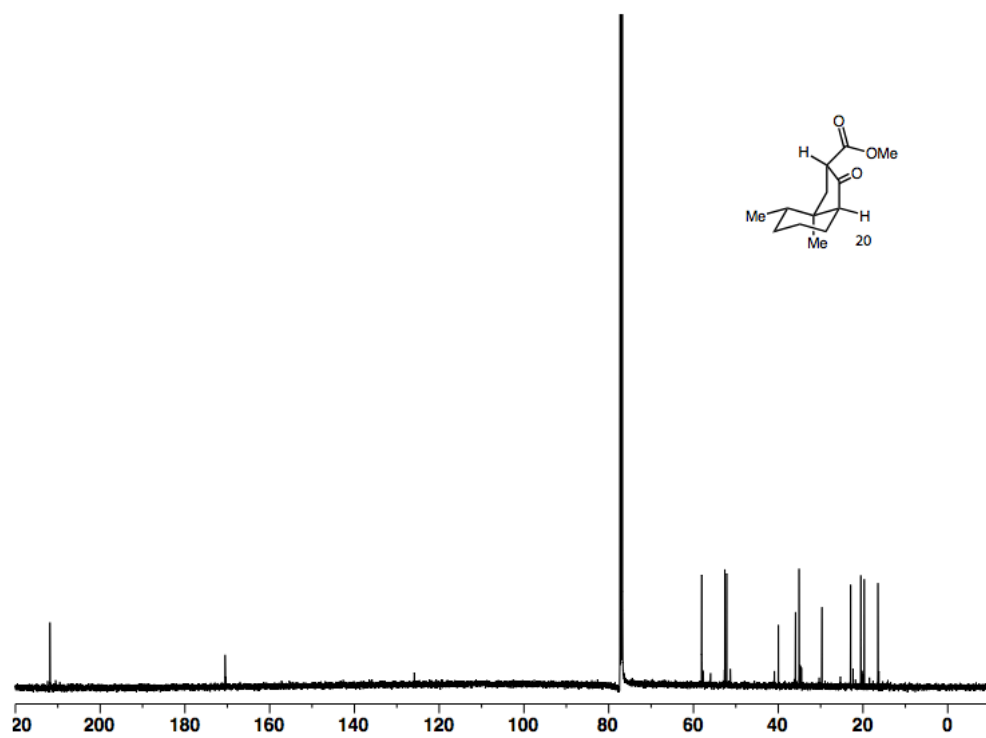

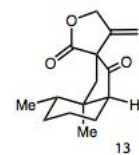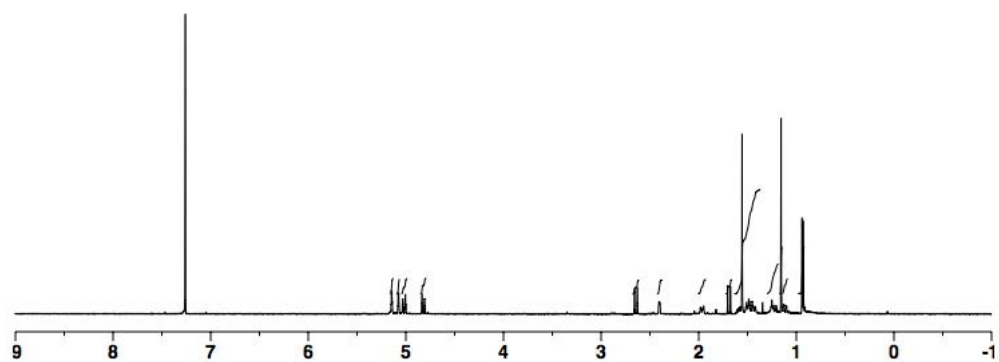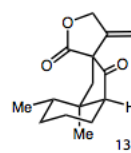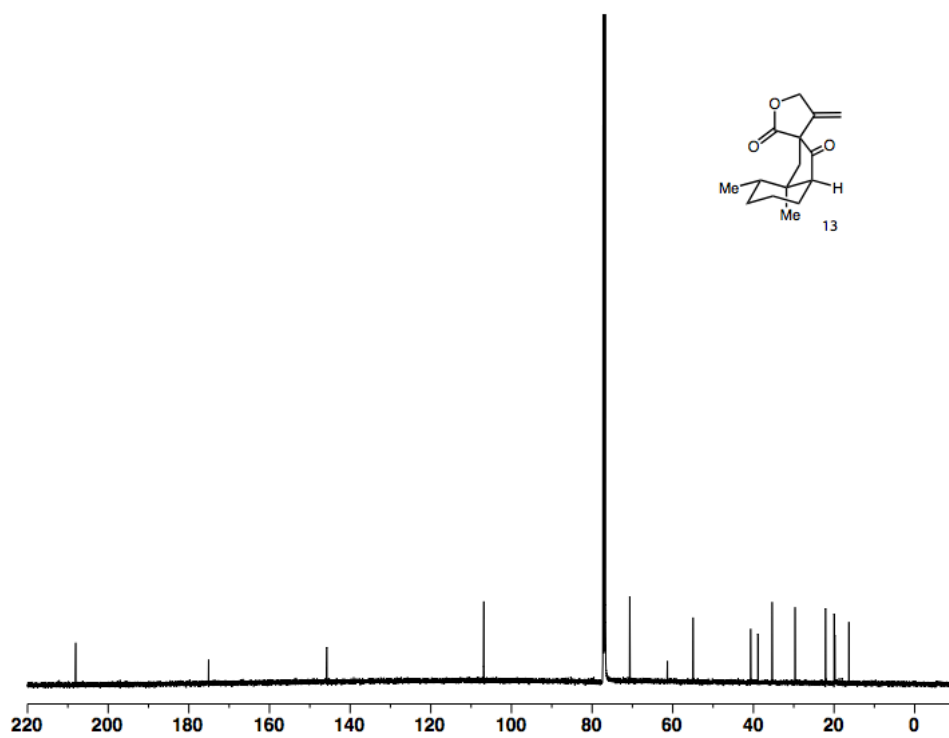

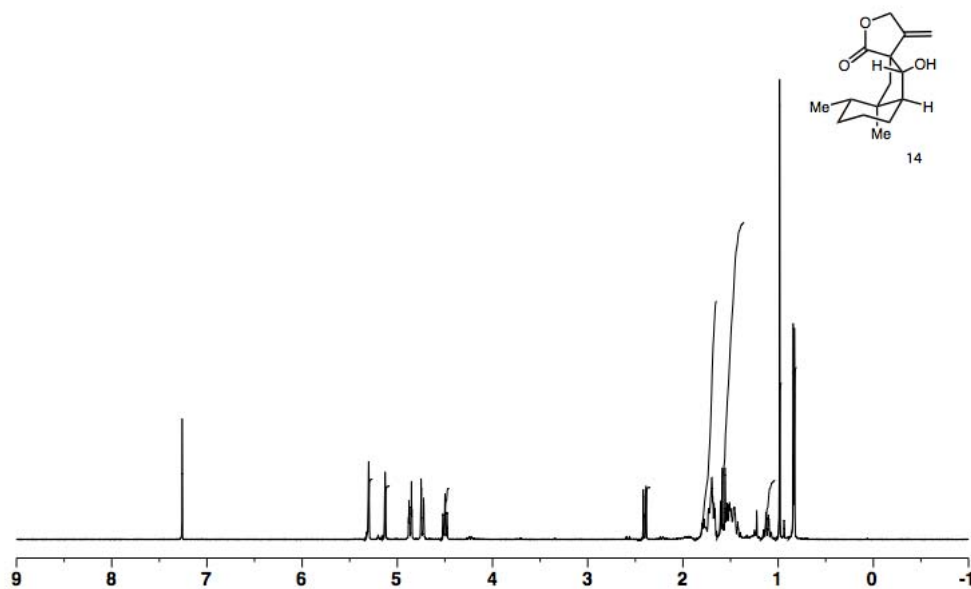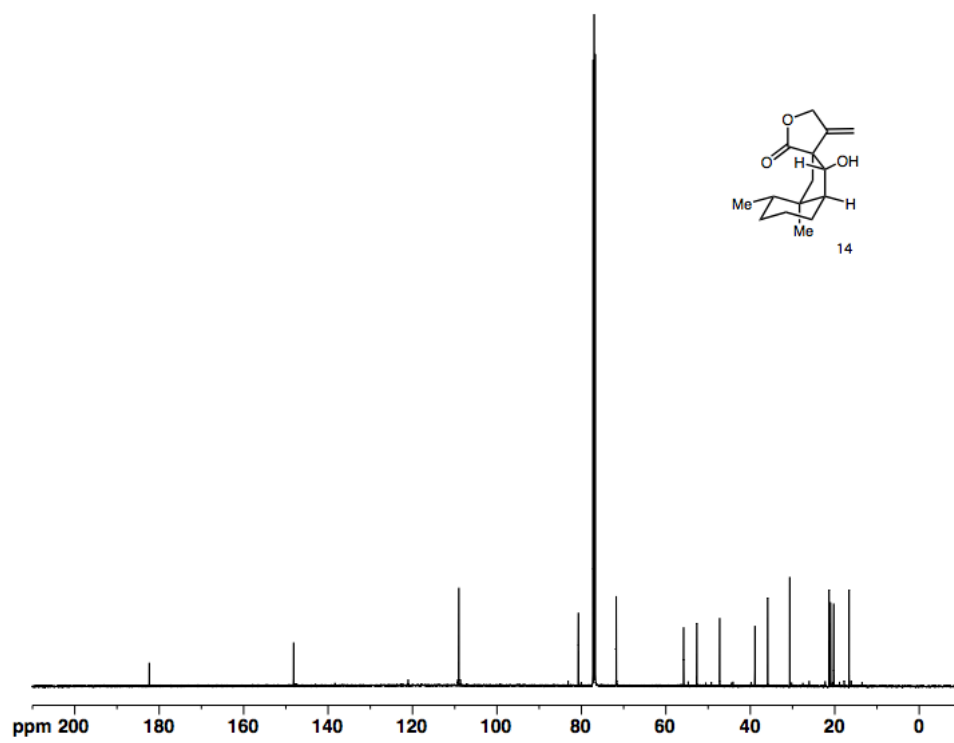

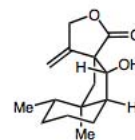

15

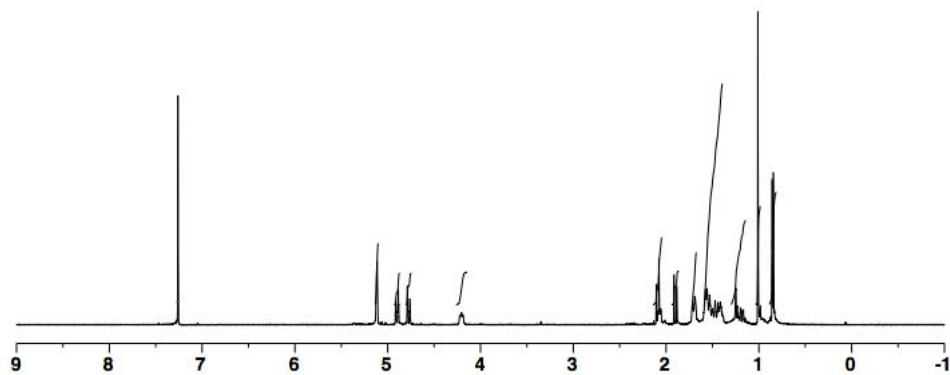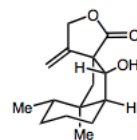

15

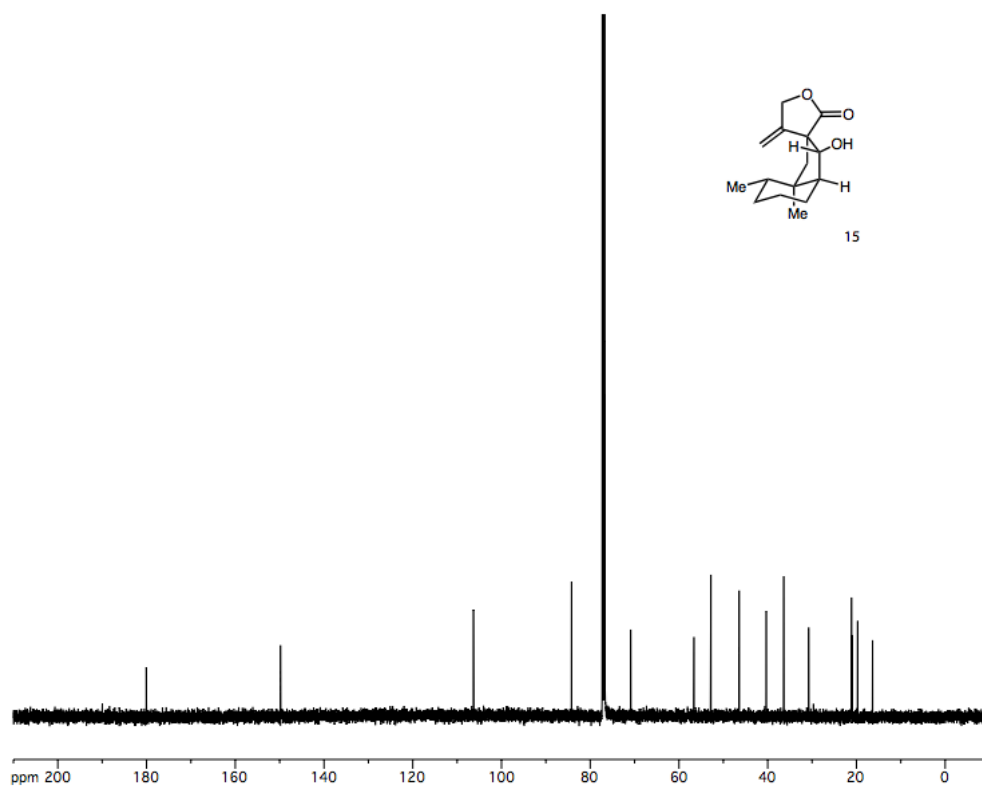



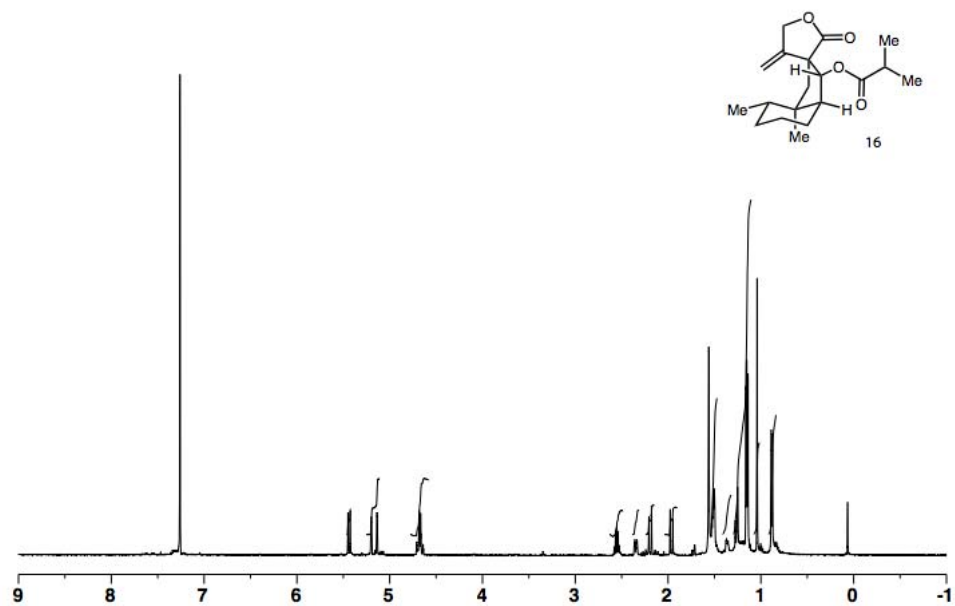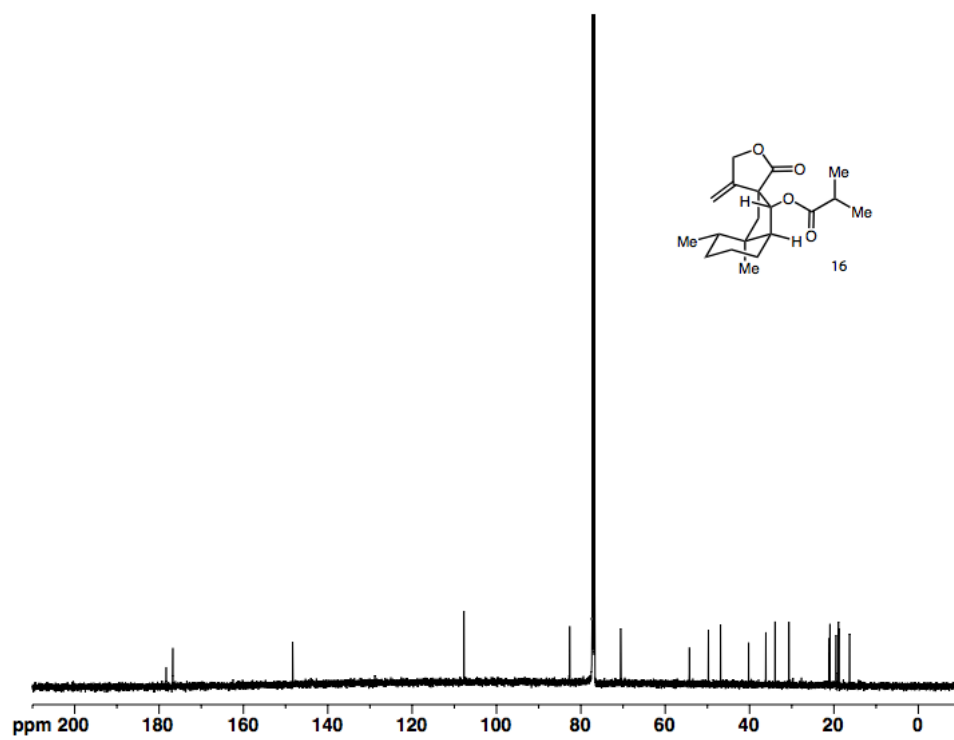

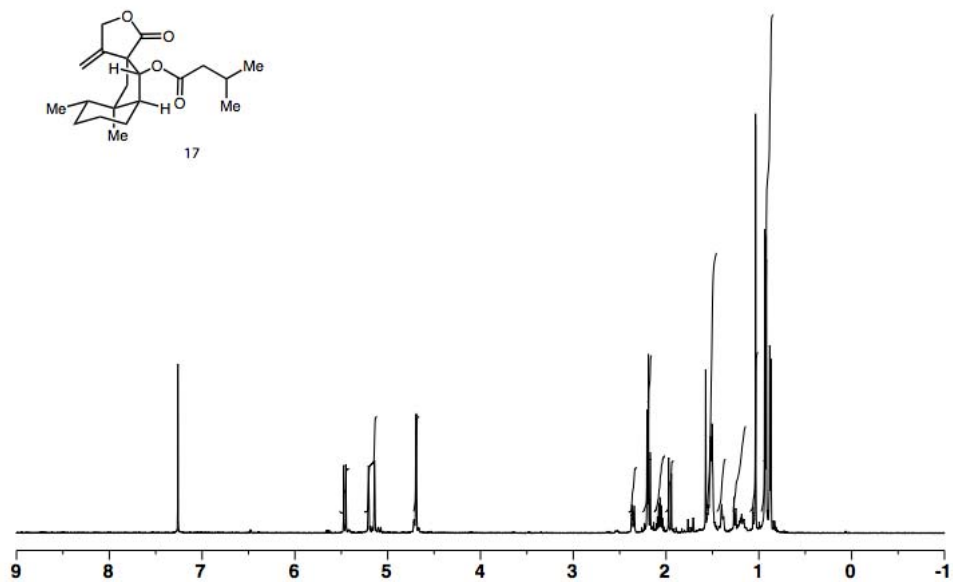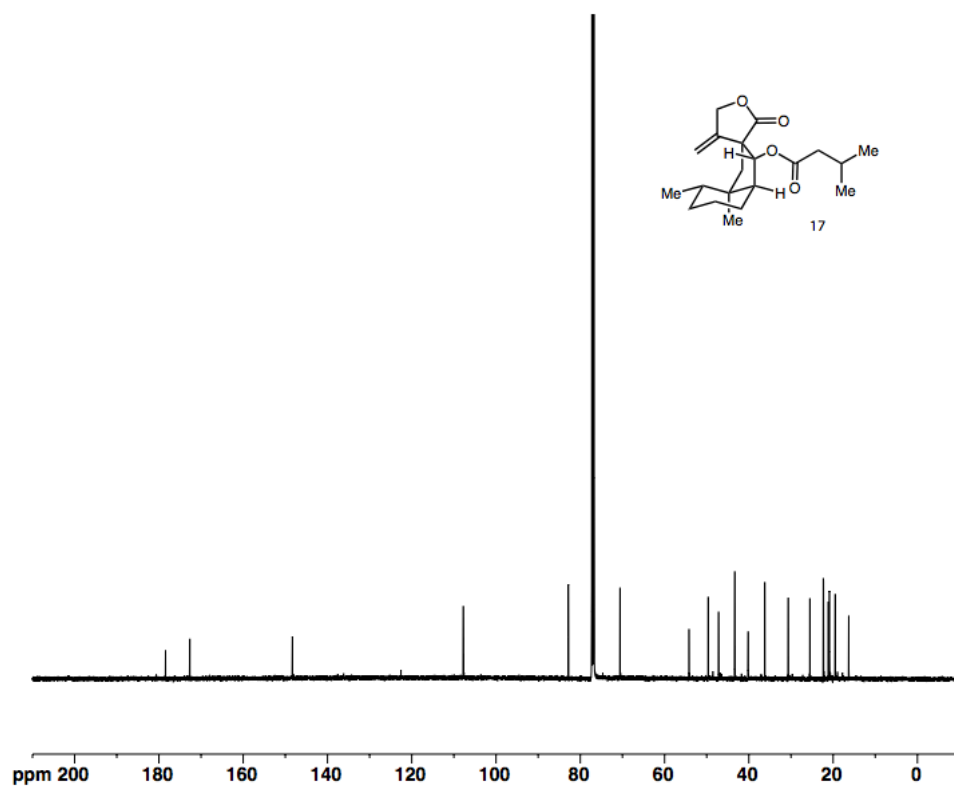

### GC Traces

#### GC Trace of 3 Racemate

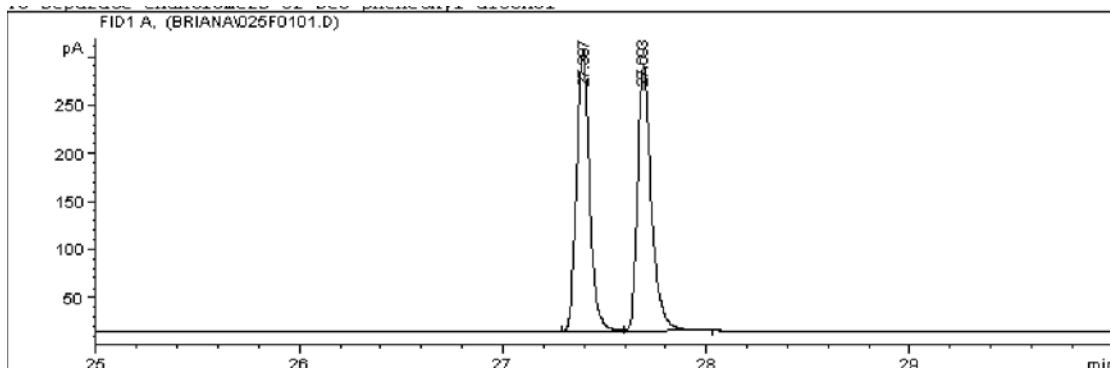

=====  
 Area Percent Report  
 =====

Sorted By : Signal  
 Multiplier : 1.0000  
 Dilution : 1.0000

Signal 1: FID1 A,

| Peak # | RetTime [min] | Type | Width [min] | Area [pA*s] | Height [pA] | Area %   |
|--------|---------------|------|-------------|-------------|-------------|----------|
| 1      | 27.397        | PV   | 0.0656      | 1291.62000  | 289.49869   | 49.90987 |
| 2      | 27.693        | VB   | 0.0664      | 1296.28491  | 275.24738   | 50.09013 |

#### GC Trace of Enantioenriched 3:

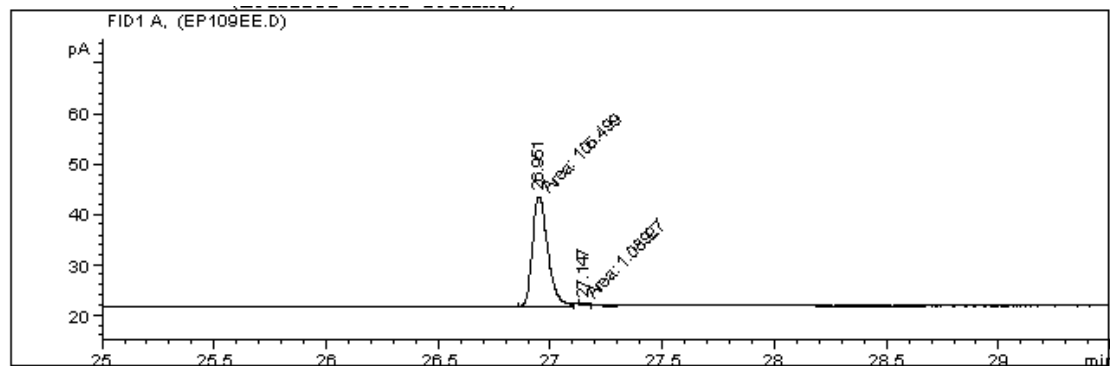

=====  
 Area Percent Report  
 =====

Sorted By : Signal  
 Multiplier : 1.0000  
 Dilution : 1.0000  
 Use Multiplier & Dilution Factor with ISTDs

Signal 1: FID1 A,

| Peak # | RetTime [min] | Type | Width [min] | Area [pA*s] | Height [pA] | Area %   |
|--------|---------------|------|-------------|-------------|-------------|----------|
| 1      | 26.951        | MM   | 0.0802      | 105.49873   | 21.93647    | 98.97806 |
| 2      | 27.147        | MM   | 0.0467      | 1.08927     | 3.88875e-1  | 1.02194  |

Comparative Analysis of  $^1\text{H}$  NMR Spectra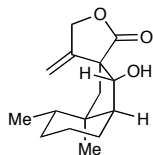**Natural<sup>3</sup>**

5.11 (bs)  
 4.90 (d,  $J = 12.8$  Hz)  
 4.77 (d,  $J = 12.8$  Hz)  
 4.20 (d,  $J = 11.2$  Hz)  
 2.08 (d,  $J = 14.0$ )  
  
 1.90 (d,  $J = 14.0$ )  
  
 1.01 (s)  
 0.85 (d, 6.4)

**Bakkenolide S****Synthetic**

5.13-5.11 (m, 2H)  
 4.90 (ddd,  $J = 12.8, 2.4, 2.4$  Hz, 1H)  
 4.80 (ddd,  $J = 12.8, 1.8, 1.8$  Hz, 1H)  
 4.21 (dd,  $J = 10.0, 7.5$  Hz, 1H)  
 2.09 (d,  $J = 14.4$  Hz, 1H)  
 2.09-2.05 (m, 1H)  
 1.90 (d,  $J = 14.3$  Hz, 1H)  
 1.72-1.68 (m, 1H)  
 1.60-1.40 (m, 4H)  
 1.25-1.20 (m, 2H)  
 1.01 (s, 3H)  
 0.85 (d,  $J = 6.7$  Hz, 3H)

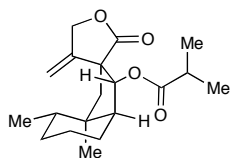**Natural<sup>3</sup>**

5.43 (d,  $J = 11.6$  Hz)  
 5.19 (t,  $J = 1.8$  Hz)  
 5.13 (t,  $J = 1.8$  Hz)  
 4.69 (dt,  $J = 12.3, 1.8$  Hz)  
 4.52 (dt,  $J = 12.3, 1.8$  Hz)  
 2.55 (sept,  $J = 7.2$ )  
 2.34 (d,  $J = 11.6$  Hz)  
 2.19 (d,  $J = 14.8$  Hz)  
 1.96 (d,  $J = 14.8$  Hz)  
 1.56 (m, 4H)  
 1.40 (m)  
 1.20 (m)  
 1.15 (d,  $J = 7.2$  Hz)  
 1.14 (d,  $J = 7.2$  Hz)  
 1.04 (s)  
 0.89 (d,  $J = 7.2$  Hz)

**Bakkenolide I****Synthetic**

5.44 (d,  $J = 11.7$  Hz, 1H)  
 5.20 (dd,  $J = 2.7, 2.7$  Hz, 1H)  
 5.14 (dd,  $J = 3.2, 3.2$  Hz, 1H)  
 4.69 (ddd,  $J = 13.0, 1.8, 1.8$  Hz, 1H)  
 4.66 (ddd,  $J = 13.0, 2.4, 2.4$  Hz, 1H)  
 2.58-2.52 (m, 1H)  
 2.36-2.33 (m, 1H)  
 2.19 (d,  $J = 14.3$  Hz, 1H)  
 1.96 (d,  $J = 14.3$  Hz, 1H)  
 1.53-1.50 (m, 5H)  
 1.38-1.34 (m, 1H)  
 1.22-1.18 (m, 1H)  
 1.16 (d,  $J = 7.0$  Hz, 3H)  
 1.15 (d,  $J = 6.9$  Hz, 3H)  
 1.04 (s, 3H)  
 0.88 (d,  $J = 6.6$  Hz, 3H)

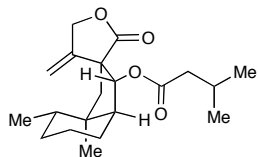**Bakkenolide J**

| <b>Natural<sup>3</sup></b>  | <b>Synthetic</b>                      |
|-----------------------------|---------------------------------------|
| 5.47 (d, J = 11.7 Hz)       | 5.46 (d, J = 11.6 Hz, 1H)             |
| 5.21 (t, J = 2.2 Hz)        | 5.21 (bs, 1H)                         |
| 5.14 (t, J = 2.2 Hz)        | 5.14 (bs, 1H)                         |
| 4.69 (t, J = 2.2 Hz)        | 4.73-4.65 (m, 2H)                     |
| 2.36 (dt, J = 11.7, 4.2 Hz) | 2.36 (ddd, J = 3.8, 11.5, 3.8 Hz, 1H) |
| 2.20 (d, J = 7.4 Hz)        | 2.20 (d, J = 7.39 Hz, 1H)             |
| 2.19 (d, J = 14.3 Hz)       | 2.19 (d, J = 14.4, 1H)                |
| 2.07 (m)                    | 2.12-2.01 (m, 1H)                     |
| 1.96 (d, J = 14.3)          | 1.96 (d, J = 14.3 Hz, 1H)             |
| 1.52 (m, 4H)                | 1.54-1.48 (m, 4H)                     |
| 1.40 (m)                    | 1.40-1.38 (m, 1H)                     |
| 1.15 (m)                    | 1.25-1.14 (m, 2H)                     |
| 1.04 (s)                    | 1.04 (s, 3H)                          |
| 0.93 (d, J = 6.7 Hz)        | 0.93 (d, J = 6.6 Hz, 3H)              |
| 0.93 (d, J = 6.7 Hz)        | 0.93 (d, J = 6.6 Hz, 3H)              |
| 0.88 (d, J = 6.6 Hz)        | 0.88 (d, J = 6.6 Hz, 3H)              |

### X-Ray Crystallography of 14

X-ray diffraction was performed at  $-120\text{ }^{\circ}\text{C}$  and raw frame data were processed using SAINT. Molecular structure was solved using direct methods and refined by F2 by full-matrix least-squares techniques. The GOF = 1.07 for 166 variables refined to  $R1 = 0.059$  for 3858 reflections with  $I > 2\sigma(I)$ . There was no absorption correction of Flack parameters. Further information is contained in the CCDC file XXX.

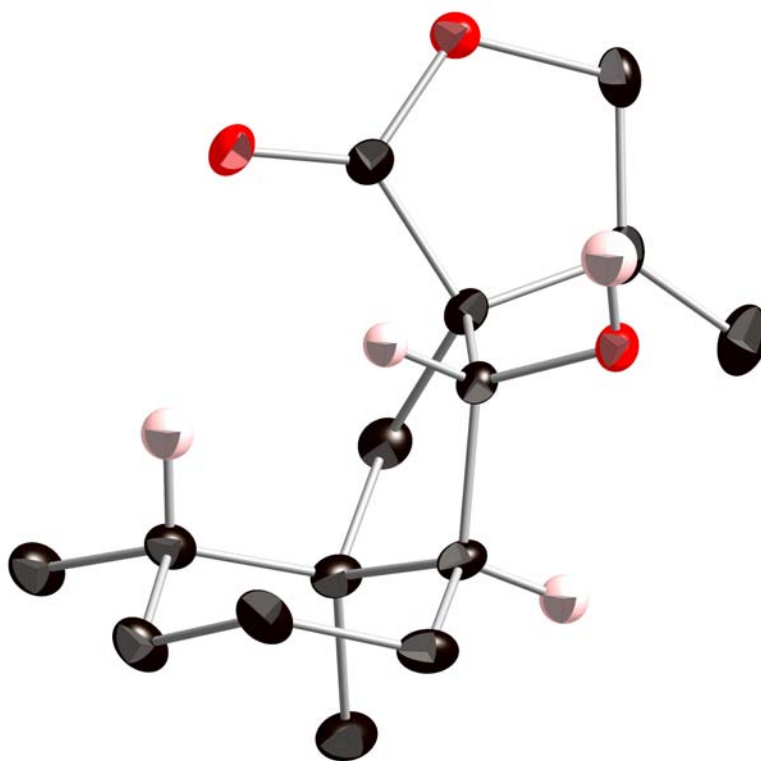

### X-Ray Crystallography of A

X-ray diffraction was performed at  $-120\text{ }^{\circ}\text{C}$  and raw frame data were processed using SAINT. Molecular structure was solved using direct methods and refined by F2 by full-matrix least-squares techniques. The GOF = 0.95 for 637 variables refined to  $R1 = 0.027$  for 7845 reflections with  $I > 2\sigma(I)$ . There was no absorption correction of Flack parameters. Further information is contained in the CCDC file 688527.

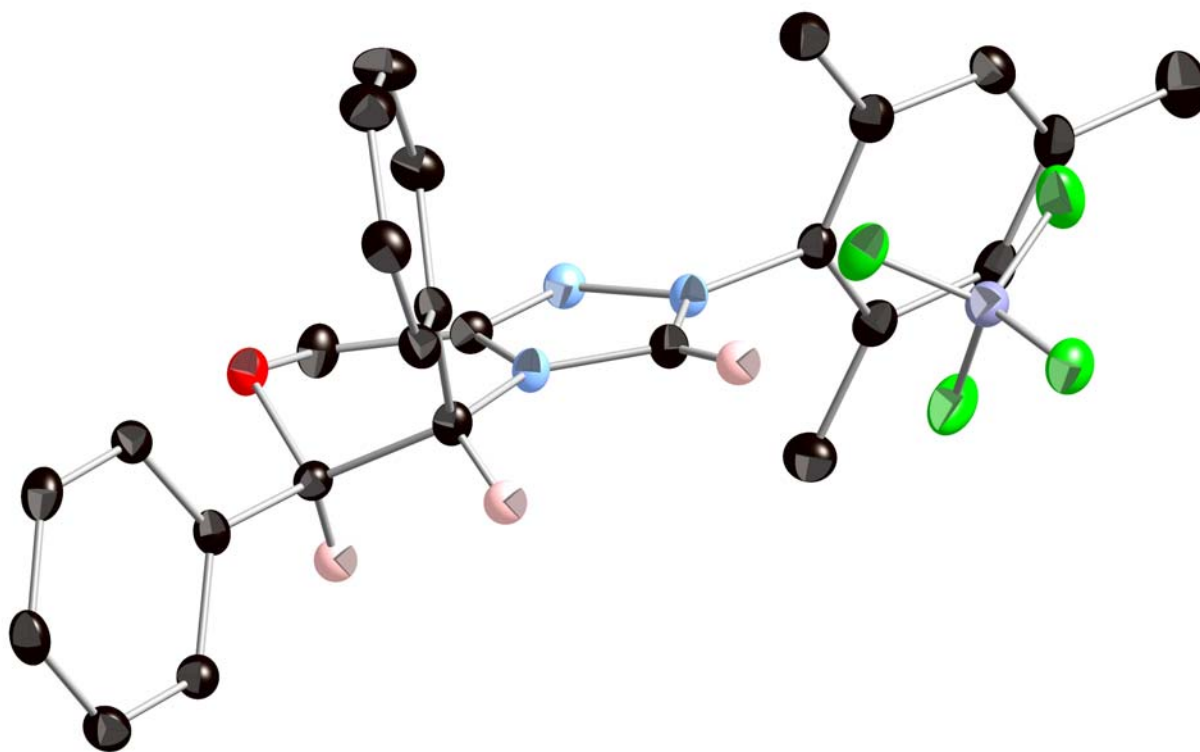

Supplement: NIHMS207345-supplement-2_si_002.pdf [file NIHMS207345-supplement-2_si_002.pdf]
